1       **Data-mining of Antibiotic Resistance Genes Provides Insight into the Community**

2                               **Structure of Ocean Microbiome**

3       Shiguang Hao<sup>1,§</sup>, Pengshuo Yang<sup>1,§</sup>, Maozhen Han<sup>1,§</sup>, Junjie Xu<sup>1</sup>, Shaojun Yu<sup>1</sup>, Chaoyun

4                               Chen<sup>1</sup>, Wei-Hua Chen<sup>1</sup>, Houjin Zhang<sup>1,\*</sup>, Kang Ning<sup>1,\*</sup>

5       <sup>1</sup>*Key Laboratory of Molecular Biophysics of the Ministry of Education, College of Life*

6       *Science and Technology, Huazhong University of Science and Technology, Wuhan, Hubei,*

7       *430074, China*

8

9       <sup>§</sup> These authors contributed equally to this work.

10       <sup>\*</sup> Corresponding author. E-mail: ningkang@hust.edu.cn, hjzhang@hust.edu.cn.

11

12 **Abstract**

13 **Background** : Antibiotics have been spread widely in environments, asserting profound  
14 effects on environmental microbes as well as antibiotic resistance genes (ARGs) within these  
15 microbes. Therefore, investigating the associations between ARGs and bacterial communities  
16 become an important issue for environment protection. Ocean microbiomes are potentially  
17 large ARG reservoirs, but the marine ARG distribution and its associations with bacterial  
18 communities remain unclear.

19

20 **Methods:** we have utilized the big-data mining techniques on ocean microbiome data to  
21 analysis the marine ARGs and bacterial distribution on a global scale, and applied  
22 comprehensive statistical analysis to unveil the associations between ARG contents, ocean  
23 microbial community structures, and environmental factors by reanalyzing 132 metagenomic  
24 samples from the *Tara* Oceans project.

25

26 **Results:** We identified in total 1,926 unique ARGs and found that: firstly, ARGs are more  
27 abundant and diverse in the mesopelagic zone than other water layers. Additionally, ARG-  
28 enriched genera are closely connected in co-occurrence network. We also found that ARG-  
29 enriched genera are often more abundant than their ARG-less neighbors. Furthermore, we  
30 found that samples from the Mediterranean that is surrounded by human activities often  
31 contain more ARGs.

32

33 **Conclusion:** Our research for investigating the marine ARG distribution and revealing the  
34 association between ARG and bacterial communities provide a deeper insight into the marine  
35 bacterial communities. We found that ARG-enriched genera were often more abundant than

36 their ARG-less neighbors in the same environment, indicating that genera enriched with  
37 ARGs might possess an advantage over others in the competition for survival in the oceanic  
38 microbial communities.

39

40 **Keywords:** data-mining, marine microbiome, antibiotic resistance gene, human impact

## 41 **Background**

42 Marine microbial communities represent one of the most abundant and complex  
43 communities on earth. Many studies on microbial communities of surface ocean waters [1, 2]  
44 have revealed a large reservoir of genes and functional modules [3]. These rich resources  
45 have been used for deep data mining [4, 5]. For example, by comparing the metagenomic  
46 data qualitatively and quantitatively, fluctuations in taxonomical composition and metabolic  
47 capabilities from various environments could be revealed [6]. In consideration of this  
48 valuable information, further investigations in complex integral biochemical metabolic  
49 processes reflecting the ways in which microbes are accustomed to changing environments  
50 should be collated and reported.

51 The *Tara* Oceans project is so far one of the largest expeditions to collect marine  
52 samples [7]. Over the past few years, this project has collected over 30,000 samples from  
53 more than 200 sampling sites [8], more than 500 high quality samples have been sequenced  
54 by whole genome sequencing (WGS) [9]. These resources provide scientists with valuable  
55 information for exploring metabolic pathways involved in biogeochemical cycles at the  
56 sampling sites and revealing complex interplays within the microbial communities and  
57 between the communities as a whole and the surrounding environments [10].

58 Ocean microbiomes are potentially large pools of antibiotics and antibiotic resistance  
59 genes (ARGs) [11]. ARGs are important to protect bacteria from antibiotics produced by  
60 other bacteria and other organisms, and is a key determinant to the dynamic balance of the  
61 bacterial community [12, 13]. Antibiotics have been widely used not only in bacterial  
62 infection treatment, but also in agriculture and animal husbandry for quite some time [13].  
63 Our research for investigating the marine ARG distribution and revealing the association between  
64 they 1) alter the community structure by killing some species that have no resistance to them  
65 [14]; other changes may follow because of complex interplays among species, and 2)

66 promote the exchange of ARGs among species [15, 16], which might in turn alter the  
67 community structure. Long-term impacts include faster evolution of ARGs [17, 18] and the  
68 rise of multidrug-resistance bacteria. Therefore research on antibiotic and ARGs have  
69 become more and more important worldwide [19, 20]. How to utilize antibiotics and control  
70 antibiotic resistance has become an increasingly important issue [21, 22], especially at  
71 industrial settings [23, 24].

72 Mechanisms of resistance to antibiotics in bacteria have only been revealed recently,  
73 thanks to the isolation and genetic characterization of bacteria with ARGs [25]. Many  
74 experimental and bioinformatics methods for identifying new antibiotics and ARGs have  
75 been developed [26, 27]. Further understanding of the functions of ARG products and their  
76 effects on the bacterial community may uncover new ways of the influence of antibiotics and  
77 ARGs on natural bacterial communities [16]. However, without advanced data-mining  
78 techniques, current studies on identification and annotation of ARG from ocean microbiome  
79 data remain illusive.

80 In this study, in order to reveal the associations between microbiota community  
81 structures and ARGs, we have utilized data-mining techniques to reanalyze 132 metagenomic  
82 samples from the *Tara* Oceans project, and examined the taxonomical structures as well as  
83 functional profiles. The enrichment of ARGs in several marine genera was investigated.  
84 Firstly, we identified in total 1,926 unique ARGs and found that the ARG contents were  
85 strongly associated with the depth: ARGs were more abundant and diverse in the  
86 mesopelagic zone than other water layers. Secondly, ARG-enriched genera, including  
87 *Flavobacterium*, *Alteromonas*, *Pseudoalteromonas* were closely connected in co-occurrence  
88 network and are biomarkers of their respective environments. Thirdly, ARG-enriched genera,  
89 such as *Alteromonas*, *Pseudoalteromonas*, *Marinobacter*, and *Flavobacterium*, were often  
90 more abundant than their ARG-less neighbors. Finally, the relationship between taxonomical

91 structures and ARGs was exemplified in *Flavobacterium*, a common marine genus which  
92 was identified as a hub node in species-species co-occurrence network. We detected the  
93 enrichment of a resistance type (*bacA*) against bacitracin in *Flavobacterium* using  
94 computational approaches and validated the results using statistical tests. Inspired by this  
95 example, we attempted to interpret how ARG enrichment occurred in many organisms and  
96 thus affected the bacterial community structure, and we hypothesized the significance of  
97 human involvement in this, and densely populated Mediterranean was exemplified to prove  
98 the ARG effect on bacterial community structure.

99

## 100 **Results and Discussions**

101

### 102 *Taxonomical analysis revealed key determinants of community compositions*

103 To facilitate the identification of ARGs and the comparison of ARG contents within  
104 and between communities (i.e. samples), we first identified the community compositions (i.e.  
105 the number of species and relative abundance of each species) for all the oceanic samples we  
106 obtained from the *Tara* Ocean project, and characterized the correlations between community  
107 structure and environmental factors, as well as between community structure and species co-  
108 occurrence patterns.

109 ***Microbial community composition and function analysis.*** We obtained in total 36,  
110 356 microbial OTUs including 715 archaeal and 35,641 bacterial OTUs, respectively.  
111 Microbial community profiles at phylum and genus level were illustrated in **Supplementary**  
112 **Fig. S1**. We identified in total 15 phyla and 24 genera that were relative abundant, i.e. with  
113 relative abundance above 0.1% (for details please check **Supplementary Table S1**).  
114 Functional analyses on specified KEGG pathway [28] level 2 and level 3 were illustrated in  
115 **Supplementary Fig. S2**

116            *Species co-occurrence network analysis.* To better understand the interactions and  
117 associations within the microbial communities, we constructed species co-occurrence  
118 networks at genus and OTU level (**Fig. 1a and 1c**). We obtained a network at the genus level  
119 (Pearson threshold  $\pm 0.1$ ) consisting 20 nodes and 130 edges, with a clustering coefficient of  
120 0.744 and a network density of 0.684. With depth-related information and their first neighbor  
121 in network on genus level, a sub-network (**Fig. 1b**) with 11 nodes (6 in surface water layer  
122 and 5 in mesopelagic zone) and 52 related edges was selected to exemplify the validity of the  
123 network (**Fig. 1a**). The 6 surface nodes and the 5 mesopelagic nodes had strong negative  
124 correlations, but in contrast, the nodes within surface water layer or mesopelagic zone  
125 showed strong positive correlations. These differences are reasonable, as symbiosis plays a  
126 leading role in the same environment, yet such symbiosis patterns might differ greatly in  
127 different environments [29]. On OTU level, a connected network with 130 nodes and 3,101  
128 edges was constructed, which had a clustering coefficient of 0.63 and a network density of  
129 0.3 (**Fig. 1c**). The largest cluster colored in black was mainly composed of species from  
130 phylum *Proteobacteria*, which was the most abundant phylum in the ocean [10]. We  
131 identified four hub nodes in this network, among which two were unclassified species of  
132 genera *Flavobacterium* and *Polaribacter* and the other two belonged to phylum  
133 *Proteobacteria*.

134            Genus *Flavobacterium* has been identified as a biomarker (depth- and oxygen-related  
135 strategies,  $p$ -value=5.96e-5 and 2.08e-7, respectively) and a hub node in co-occurrence  
136 network, the importance of which was confirmed by previous studies: it is strictly aerobic and  
137 tended to live in surface water with high-concentration of chlorophyll and phytoplankton [30,  
138 31], and played an important role in carbon cycling in bacterial communities [32].

139

140            *Distribution of antibiotic resistance genes across water layers*

141 By searching 81,850,381 protein sequences from 132 samples against the ARDB  
142 database [33], 1,926 unique ARGs were detected (**Supplementary Table S2**). These  
143 sequences account for only 0.024% of all predicted proteins, which is much lower than that  
144 of the human gut microbiome [27]. The 1,926 unique ARGs were classified into 70 different  
145 types according to their gene names. This resulted in 27 multidrug types (efflux-mediated),  
146 38 single-drug types (non-efflux), and 5 target-specific types (efflux-mediated). Of the 132  
147 samples, 126 (95.4%) contain at least one ARG sequence (**Supplementary Table S3**).

148 We correlated the ARG-contents with water layers in order to investigate how ARG  
149 distribution was affected. The samples were collected from three layers: surface water layer  
150 (SRF), deep chlorophyll maximum layer and subsurface epipelagic mixed layer (DCM/MIX),  
151 and mesopelagic zone (MES). We found that among three water layers, SRF and DCM/MIX  
152 harbored 44 and 39 resistance types, respectively, while MES harbored 59 resistance types  
153 (**Supplementary Table S4**), suggesting there were more resistance types in the deeper water  
154 layer. For example, dataset ERS490633 from MES had 26 resistance types, which was the  
155 largest amount in a single dataset, while 11 datasets (9 from SRF, one from DCM/MIX and  
156 one from MES) had only one resistance type (**Supplementary Table S3**). To eliminate biases  
157 due to sequencing depths, we normalized the number of resistance types and ARG sequences  
158 in each dataset by the number of processed reads and the number of OTUs (**Supplementary**  
159 **Table S3, Fig. 2a and 2b**). The results showed that the mean of normalized number of  
160 resistance types in MES (0.000991) was significantly higher than that in SRF (0.000297) and  
161 DCM/MIX (0.000415), with  $p$ -value=4.251e-11 and 3.836e-9, respectively (Mann-Whitney  
162 test); but the difference between SRF and DCM/MIX was not significant (Mann-Whitney test,  
163  $p$ -value=0.01429>0.01). The mean of normalized number of ARG sequences in MES  
164 (0.002439) was significantly higher than that in SRF (0.000525) and DCM/MIX (0.000875),  
165 with  $p$ -value=1.031e-11 and 8.843e-9, respectively (Mann-Whitney test); and the difference



166 between SRF and DCM/MIX was also significant ( $p$ -value=2.202e-3). Together, these results  
167 suggested that ARGs in MES were significantly more diverse; and the diversity increased  
168 when the sampling proceeds to deeper zones. And the increasing species richness was also  
169 detected when the sampling proceeds to deeper zones according to our biodiversity statistic  
170 and previous research for *Tara* Oceans analysis [10, 34]. With limited carbon source and high  
171 mobility of mesopelagic zone, the bacteria had a low growth speed but can escape the  
172 predator and viral infect [35].

173 The 70 resistance types were unevenly distributed among the three water layers  
174 (**Supplementary Fig. S7**). For example, *mexF* was present in 41 out of 55 datasets (74.5%)  
175 in SRF, 40 of 42 datasets in DCM/MIX (95.2%), and all 29 datasets in MES (100%)  
176 (**Supplementary Table S5**), while 5, 2, and 17 types were found to be specific to SRF,  
177 DCM/MIX, and MES, respectively (**Supplementary Table S4**). The top 10 most abundant  
178 resistance types in each layer were plotted in **Fig. 2c**. All top 10 resistance types in MES  
179 were present in more than half of datasets, while only 2 and 4 of the top 10 resistance types in  
180 SRF and DCM/MIX were present in more than half of datasets, respectively  
181 (**Supplementary Table S5**). This result indicates the resistance types in MES are distributed  
182 more widely. The following multidrug resistance types, including *mexF*, *mexB*, *acrB*, *ceoB*,  
183 and *mexW*, were found in the top 10 of three layers, with a high abundance, which suggests  
184 that multidrug resistance types are abundant and common and have important contributions to  
185 antibiotic resistance [36].

186 To investigate the antibiotic resistance gene classification, the 1,926 unique ARGs  
187 were mapped according to WHOCC ATC/DDD Index  
188 ([https://www.whocc.no/atc\\_ddd\\_index/?code=J01](https://www.whocc.no/atc_ddd_index/?code=J01)) and the relative abundances of types  
189 conferring resistance to the same antibiotic were calculated (**Fig. 2d**). Only 333 of the 1,926

190 ARG sequences were classified. The excluded sequences are 228 *ksgA* sequences, for which  
191 we cannot find a proper Index, and 1,365 multidrug efflux pumps.

192

### 193 ***ARG-enriched genera and their connection with biomarkers and co-occurrence network***

194 As a result of taxonomical assignment of ARGs, we successfully assigned 1,659  
195 unique ARGs to 11 genera, which could be classified into 75 resistance types  
196 (**Supplementary Table S6**). The enrichment of ARGs at genus level was exemplified by the  
197 20 resistance types illustrated in **Fig. 3** (see **Supplementary Table S6 and S7** for all the 75  
198 resistance types). To determine whether a resistance type was enriched in a genus, univariate  
199 hypergeometric tests (**Fig. 3a**) were applied on each resistance type against each genus, with  
200 results showing that ARGs of 37 resistance types were found enriched in at least one genus  
201 ( $p$ -value<0.01). Meanwhile, to determine whether a genus was enriched with ARGs,  
202 multivariate hypergeometric tests were applied on all the resistance types against each genus,  
203 with results showing that 4 genera were well enriched with ARGs, including *Marinobacter*  
204 ( $p$ -value=6.82e-201), *Alteromonas* ( $p$ -value=8.28e-198), *Flavobacterium* ( $p$ -value=5.90e-  
205 143), and *Pseudoalteromonas* ( $p$ -value=3.25e-101) (**Fig. 3d**), and these 4 genera indeed  
206 harbored most ARGs (435, 515, 101 and 602 respectively). To determine whether a  
207 resistance type is enriched in all genera, multivariate hypergeometric tests (**Fig. 3b**,  
208 **Supplementary Table S8**) on each resistance type was performed again, which revealed that  
209 *bacA* was the third enriched type in these genera ( $p$ -value=1.67e-63), behind *mexF* and *ksgA*  
210 ( $p$ -value=3.84e-96 and 3.30e-72, respectively).

211 In above-mentioned taxonomy and biomarker analysis, many of the 11 ARG-  
212 containing genera were the members in the species co-occurrence network on genus level,  
213 indicating close connections among these genera. These genera had a clustering coefficient of  
214 0.875, which was higher than the whole network clustering coefficient 0.744. Interestingly,

215 *Flavobacterium* (ARG-enriched) and *Polaribacter* (ARG-containing) were identified as hub  
216 nodes in the co-occurrence network. Top 4 ARG-enriched genera were all important  
217 biomarkers, with an average relative abundance above 0.1% in the 132 samples  
218 (**Supplementary Table S1**).

219 In the top 4 ARG-enriched genera, *Flavobacterium* was an important biomarker and  
220 hub node, it might have extensive interactions with other species, and the ARGs in  
221 *Flavobacterium* might protect it from antibiotics produced by other organisms in the same  
222 environment. Resistance type *bacA* was observed in several genera, but it drew our attention  
223 due to its enrichment in *Flavobacterium*, which was confirmed by both univariate and  
224 multivariate hypergeometric tests. We also found that 73.9% of all 66 *bacA* sequences were  
225 from *Flavobacterium* (**Fig. 3c**), and 41.58% of ARGs from *Flavobacterium* were *bacA* (**Fig.**  
226 **3e**).

227 It has been shown that genus *Flavobacterium* plays an important role in community  
228 carbon cycling [31]. And the production of *bacA* shows undecaprenyl pyrophosphate (key  
229 component in cell wall biosynthesis) phosphatase activity and thus confers resistance to  
230 bacitracin that inhibits dephosphorylation [37]. With the metabolism production to develop  
231 the cell wall against the bacitracin, *bacA* shows the protective function as an ARG indirectly  
232 rather than inhibit the bacitracin itself. And as *bacA* gene was located on the chromosome of  
233 *Flavobacterium*, which could encode protein effectively and was more stable than genes in  
234 plasmid [38]. Combining taxonomical analysis and ARG analysis, *bacA* might account for the  
235 role of *Flavobacterium* as a community hub and in carbon cycling, and previous genome  
236 analysis results showed that *bacA* indeed had been annotated in *Flavobacterium* [38].

237

238 ***ARG impact on microbial community structure***

239 In order to further analyze how ARGs affected the bacterial community, we  
240 constructed a phylogenetic tree of 1,405 marine microbial genera (**Fig. 4a**) that we have  
241 identified (see **Supplementary File** for details), including 82 archaea and 1,323 bacteria.  
242 Based on the resulting phylogeny, we extracted 8 subtrees for the 11 ARG-enriched genera  
243 and their closest neighbors (**Fig. 4b**); in total 42 genera were included in the 8 subtrees.  
244 Within each subtree, pairwise *t*-tests were used to compare the relative abundances between  
245 the two species of each possible pairs across all 132 samples. We found that these ARG-  
246 enriched genera were all significantly more abundant than their ARG-less neighbors in the  
247 subtrees ( $p$ -value<0.01).

248 More importantly, genera with close evolutionary relationship (i.e. neighbors in the  
249 subtrees) typically exist in similar environments [39]. However, on the 8 subtrees in **Fig. 4b**,  
250 the genera in the same subtree had a significant abundance difference in the marine bacterial  
251 communities (**Fig. 4c**). Combining the ARG distribution of the 37 genera, we found that  
252 genera with more ARGs had a higher abundance in the bacterial community (**Fig. 4d**).  
253 Therefore, our results indicated that ARG-enriched genera have a competitive advantage over  
254 ARG-less genera in the same environment.

255 In ocean environment, the ARGs could not only confer the antibiotics, but also had  
256 specific metabolic functions for ARG-enrichment genera [40], such as enzymatic synthesis,  
257 protein modification and metabolites degradation to protect the bacteria from outside attack. For  
258 example, the ARG *bacA* enriched in *Flavobacterium* and take part in the cell wall  
259 development.

260

### 261 *Abundance of ARGs in Mediterranean samples implies a human factor*

262 We next investigated if the abundances of ARGs in different samples could be (at  
263 least partially) influenced by human activities. Our hypothesis on how human activities could

264 impact ARG contents and the community structure is illustrated in **Fig. 5a**. As we mentioned  
265 earlier, antibiotics used in Antimicrobial-producing industries, agriculture and House-hold  
266 waste may partially end up in the ocean through drainage and rainfall. Aquaculture,  
267 Antimicrobial-producing industries wasted water may directly Increase the amount of  
268 antibiotics into the ocean. And Antibiotics can be diluted easily in the open ocean [41], but  
269 not so in more closed water such as Mediterranean, especially when the latter is surrounded  
270 by human activities. The presence of antibiotics in the ocean may change the dynamic  
271 balance between naturally occurring antibiotics and ARGs [42], and will change the  
272 community structure by either killing some species that have no resistance to them [14], or  
273 promoting the exchange of ARGs among species [15, 16] that will also alter the community  
274 structure in the long term, or both. Consistent to our hypothesis, previous studies reported an  
275 increased anthropogenic impact on the antibiotic resistance profile in river estuary [43],[44].

276 In our study, we found that the average relative quantity (detailed normalization  
277 method in **Materials and Methods**) of ARGs detected in Mediterranean (the value is  $7.18e-4$ )  
278 was noticeably higher than that in South Atlantic Ocean (the value is  $2.13e-11$ ). The reason  
279 behind might be that Mediterranean was enclosed water and near to the in-shore source of  
280 human-caused antibiotic content increase [45], while South Atlantic Ocean was more open  
281 and less impacted by human activities [46]. Alpha diversity analysis for species diversity of  
282 an environment also supported the potential effect of human-activity on in-shore ARGs: the  
283 average of both Shannon index and Simpson index are lower in Mediterranean than in South  
284 Atlantic Ocean (0.811 versus 0.906, and 0.333 versus 0.386 for the two indexes, respectively).  
285 As we have showed in **Fig. 4**, ARG-enriched bacteria could have competitive advantages  
286 over ARG-less species; this would be true especially when antibiotics are present (as  
287 illustrated in **Fig. 5c and 5d**). The difference indicated that environmental factors and human

288 activities might be a key factor affecting ARG contents as well as microbial community  
289 structures [47].

290

## 291 **Conclusion**

292 In this work, we reanalyzed the 132 metagenomic samples from the *Tara* Oceans  
293 project. Firstly, datasets grouped by different strategies have been compared, with results  
294 showing that water temperature, geographical locations and depth have exerted significant  
295 effects on the structure and functional profiles of the communities. Secondly, we have found  
296 biomarkers that were highly related with temperature (*Synechococcus* and *Prochlorococcus*,  
297 tending to live in warmer places), locations (*Planctomyces*, enriched in Atlantic Ocean), and  
298 depth (*Nitrospina* and *Alteromonas*, enriched in deeper layers). Thirdly, the analysis of  
299 species-species associations has revealed that the species co-occurrence patterns were heavily  
300 dependent on their environments. Finally, thousands of unique ARGs were identified, whose  
301 distribution patterns differ greatly by geographical locations and temperature. We found that  
302 ARG-enriched genera, such as *Alteromonas*, *Pseudoalteromonas*, *Marinobacter*, and  
303 *Flavobacterium*, were often more abundant than their ARG-less members in the same  
304 environment. More interestingly, an ARG against bacitracin (*bacA*), which was found in  
305 genus *Flavobacterium*, is pervasive in various environments, indicating that genera enriched  
306 with ARGs might possess an advantage over others in the competition for survival in the  
307 oceanic microbial communities.

308 Our study showed that deep mining of public marine metagenomic data could be  
309 useful for better understanding of the associations between community structures and  
310 functions of their key genes (e.g. ARGs). We believe that more profound associations and  
311 even causal relationships or patterns could be discovered by appropriate utilization of such  
312 resources and equally important by applying advanced data-mining techniques. In light of

313 this, such integration of biotechnology (metagenomics) and information technology (data  
314 mining) would still need more high-quality multi-scale omics data. For example, such  
315 approaches might help us for better understanding of the process and significance on how  
316 human activities might affect ARGs, and subsequently affect the bacterial communities.

317

## 318 **Abbreviation**

319 ARG: antibiotic resistance genes; WGS: whole genome sequence; *bacA*: Bacitracin  
320 Transport ATP-binding Gene; KEGG: Kyoto Encyclopedia of Genes and Genomes; OTU:  
321 Operational Taxonomic Unit; ARDB: Antibiotic Resistance Genes Database; SRF: Surface  
322 Water Layer; DCM/MIX: Subsurface Epipelagic Mixed Layer; MES: Mesopelagic Zone;  
323 *mexF*, *mexB*, *ceoB*: Multidrug Resistance Efflux Pump; *acrB*: Acriflavin Resistance; *ksgA*:  
324 Kasugamycin Resistance; EBI: The European Bioinformatics Institute; SPO: South Pacific  
325 Ocean; NPO: North Pacific Ocean; RS: Red Sea; MS: Mediterranean; SIO: South Indian  
326 Ocean; NIO: North Indian Ocean; NAO: North Atlantic Ocean; SAO: South Atlantic Ocean;  
327 PCC: Pearson Correlation Coefficient.

328

## 329 **Declarations**

### 330 **Funding**

331 This work was partially supported by National Key Basic Research Program of China  
332 (No.2013CB933900), National Science Foundation of China grant 31671374 and 31670793,  
333 Ministry of Science and Technology's high-tech (863) grant 2014AA021502, Fundamental  
334 Research Funds for the Central Universities and Sino-German Research Center grant GZ878.

335

### 336 **Availability of data and materials**

337 A total of 132 metagenomic samples of Tara Oceans Project ERP001736 hosted on EBI  
338 Metagenomics were downloaded (<https://www.ebi.ac.uk/metagenomics/projects/ERP001736>)

339

#### 340 **Author Contributions**

341 Houjin Zhang and Kang Ning designed this study; Shiguang Hao, Chaoyun Chen and  
342 Pengshuo Yang collected and organized datasets; Shiguang Hao, Pengshuo Yang, Maozhen  
343 Han, Junjie Xu and Shaojun Yu analyzed the data; Shiguang Hao, Pengshuo Yang, Maozhen  
344 Han and Shaojun Yu interpreted the results; Shiguang Hao, Pengshuo Yang, Wei-Hua Chen,  
345 Houjin Zhang and Kang Ning wrote the initial draft of the manuscript; Shiguang Hao,  
346 Pengshuo Yang, Maozhen Han, Wei-Hua Chen, Houjin Zhang and Kang Ning revised the  
347 manuscript; all authors have read and approved the manuscript.

348

#### 349 **Consent for publication**

350 Not applicable

351

#### 352 **Ethical Approval and Consent to participate**

353 Not applicable

354

#### 355 **Competing financial interests**

356 The authors declare no competing financial interests.

357

#### 358 **Materials and Methods**

##### 359 *Datasets and categorizing strategies*

360 A total of 132 metagenomic samples of *Tara* Oceans Project ERP001736 hosted on  
361 EBI Metagenomics were downloaded



362 (<https://www.ebi.ac.uk/metagenomics/projects/ERP001736>) (**Supplementary Table S9**).  
363 These datasets were processed using the EBI Metagenomics pipeline  
364 (<https://www.ebi.ac.uk/metagenomics/pipelines/2.0>) prior to our downloading. The  
365 physical/chemical information was retrieved from the project site on EBI Metagenomics, and  
366 the geographical information was obtained from the supplementary file of ref. [10].

367 To analyze the correlations of environmental factors and taxonomical and functional  
368 profiles, we manually categorized the 132 samples into different groups according to their  
369 environmental attributes (**Supplementary Table S9, Supplementary Fig. S8**). We used 5  
370 different attributes, namely depth (L, H), temperature (L1, L2, H1, H2), chlorophyll  
371 concentration (L1, L2, H1, H2), oxygen concentration (L1, L2, H1, H2), and geographical  
372 locations to group the 132 samples into distinct subgroups. For each attribute, the number of  
373 subgroups was indicated in the parenthesis; for the geographical location, the 132 samples  
374 were first divided into two groups and then in total eight sub-groups: the first group included  
375 samples from South Pacific Ocean (SPO), North Pacific Ocean (NPO), Red Sea (RS), and  
376 Mediterranean (MS), while the second group included samples from South Indian Ocean  
377 (SIO), North Indian Ocean (NIO), North Atlantic Ocean (NAO), and South Atlantic Ocean  
378 (SAO); datasets without such information were removed from subsequent analysis. Each  
379 resulting group contains similar number of datasets, with one exception that only five datasets  
380 are in the group of shallow area with a low oxygen concentration due to high temperature.  
381 The detailed categorizing criteria and results are shown in **Supplementary Table S10-S13**.

382

### 383 *Taxonomical and functional profiling of metagenomic datasets*

384 *Analysis of taxonomical and functional profiles.* For each dataset, 16S rDNA  
385 sequence reads were extracted from processed reads using Parallel-Meta v3.2.1 [48]. The  
386 files containing the 16S rDNA sequences (in fasta format) were used as input data and

387 submitted to Parallel-Meta. By aligning non-chimeric reads to the Greengenes database  
388 (v13\_5) [49], the OTUs were obtained based on a sequence similarity cut-off of 97%.  
389 Sensitive alignment mode and Fwd & Rev pair-end sequence orientation were used. Other  
390 parameters were kept default. Based on the taxonomical structures and relative abundance of  
391 communities, functional annotations at phylum, genus, and Operational Taxonomic Unit  
392 (OTU) levels were analyzed according to Kyoto Encyclopedia of Genes and Genomes  
393 (KEGG) [28]. Alpha diversity statistical methods including Shannon index, Simpson index  
394 were used for 132 samples.

395 *Construction of co-occurrence network on species level.* To characterize the  
396 microbial communities comprehensively, network analysis was performed on phylum, genus,  
397 and OTU levels. As relative abundances of species were calculated by Parallel-Meta, only  
398 those with abundances above 0.01% were kept for network construction. Species co-  
399 occurrence matrix was generated using in-house C++ scripts, calculated by making the  
400 quantitative comparison between species using the Pearson Correlation Coefficient (PCC) for  
401 each pair of bacteria. The PCC threshold at different levels was set to  $\pm 0.10$ ,  $\pm 0.10$ , and  $\pm 0.50$ ,  
402 respectively. For choosing reasonable method to calculate the species co-occurrence  
403 correlation, the alpha diversity in taxonomy analysis and abundance distribution on OTU  
404 level were considered [50]. With average Simpson index of 0.99 and more than 50% sparse  
405 after filtering to remove very rare OTUs, Pearson correlation was reasonable for bacteria data  
406 without time series. A species co-occurrence matrix including all qualified pairwise PCC was  
407 generated and imported to Cytoscape v3.4.0 for further analysis [51]. MCODE algorithm was  
408 used as a clustering method for network analysis [52]. When degree was  $>2$  and node score  
409 was  $>0.2$ , the node was clustered. The largest depth for clustering was 100. Other parameters  
410 were set as defaults.

411

## 412 *Metagenomic assembly and prediction of antibiotic resistance genes*

413 The processed reads were assembled and processed by using DESMAN [53], with  
414 nextflow pipeline to perform the reads assembly and contig binning. With a collection of 37  
415 genes from bacteria and archaea to identify contig bins, the species distribution in 132  
416 samples could be calculated.

417 A protein reference file was downloaded from Antibiotic Resistance Genes Database  
418 (ARDB, <http://ardb.cbcb.umd.edu/>) [33]. Entries with 100% identical sequences were merged,  
419 and three nucleotide sequences that are not indexed in ARDB website were removed. After  
420 being cleaned up, the reference contained 2,893 translated sequences of ARGs. Blastx  
421 searching was performed with an e-value threshold of 1e-10. A query sequence was  
422 annotated as an ARG if the first high-score pair (HSP) of its top hit showed a percent identity  
423  $\geq 60\%$  and a query coverage  $\geq 70\%$ .

424 The number of unique ARGs detected in each dataset was normalized by the number  
425 of reads (representing the data size of the sample) and the number of OTUs (representing the  
426 complexity of the sample) in that dataset.

$$\text{Relative quantity of ARGs} = \frac{\# \text{ of ARGs in a dataset}}{\frac{\# \text{ of OTUs}}{1000} \times \frac{\# \text{ of reads}}{1000000}}. \quad (1)$$

427 The number of resistance types in each dataset was normalized according to equation.

$$\text{Relative quantity of resistance types} = \frac{\# \text{ of resistance types in a dataset}}{\frac{\# \text{ of OTUs}}{1000} \times \frac{\# \text{ of reads}}{1000000}}. \quad (2)$$

428

## 429 *Antibiotic resistance gene enrichment in marine microbial genera*

430 Twenty-four genera were selected for this analysis, each having an average abundance  
431 above 0.1% among samples. Of these genera, “HTCC” and “SargSea-WGS” were abandoned  
432 due to their ambiguous names. Records related to the remaining 22 genera in the NCBI nr  
433 database (retrieved on 24th Nov, 2016) were extracted and filtered, and 2,919,490 unique

434 accessions were obtained. BLASTp searching against the NCBI nr database was performed  
435 and restricted among these accessions. The e-value threshold was set to 1e-10. For each query  
436 sequence, the organism name of its top hit subject sequence was assigned to it, if the percent  
437 identity is  $\geq 40\%$ . In cases where the subject sequence has multiple organism names on record,  
438 the first one was selected.

439 The enrichment analysis was performed as below. 1) To determine whether a  
440 resistance type is enriched in a genus, we performed univariate hypergeometric test on each  
441 resistance type against each genus using Scipy module in Python (<http://www.scipy.org/>). 2)  
442 To determine whether a resistance type is enriched in all genera ( $p\text{-value} < 0.01$ ), we  
443 performed multivariate hypergeometric test on each resistance type against all genera using R  
444 package BiasedUrn v1.05 (<https://cran.r-project.org/web/packages/BiasedUrn/>). Central  
445 multivariate hypergeometric distribution model was used in the calculation of  $p$ -values. 3) To  
446 determine whether a genus is enriched with ARGs of all resistance types when compared  
447 with other genera, we performed multivariate hypergeometric test on each genus against all  
448 resistance types using BiasedUrn based on central multivariate hypergeometric distribution  
449 model. 4) To determine among all genera containing *bacA*, which one is more *bacA*-enriched,  
450 we introduced a relative proportion calculation method: The quantity of *bacA* sequences in  
451 each *bacA*-containing genus was counted, and the results were normalized (dividing the  
452 number of *bacA* sequences of this genus, by the total number of *bacA* sequences for all  
453 genera) and illustrated. 5) To determine among all resistance types enriched in genus  
454 *Flavobacterium*, we again used the relative proportion calculation method in 4). The quantity  
455 of all ARGs from *Flavobacterium* were counted, and the results were normalized (dividing  
456 the number of *bacA* sequences of *Flavobacterium*, by the total number of ARG sequences of  
457 *Flavobacterium*) and illustrated.

458           In order to uncover the association of human activities, ARGs, and microbial  
459 communities, a phylogenetic tree including 1,405 detected marine genera in 132 samples was  
460 constructed at genus level, then the abundance and ARG distribution of ARG-enriched genus  
461 and their neighbors in the same subtree were compared. There are in total 1,664 genera  
462 identified by Parallel-Meta; after removing genera with multiple taxonomy IDs from the  
463 NCBI taxonomy database [54] and manually adding some genera with conflicting names in  
464 Parallel-Meta and NCBI taxonomy database, we obtained 1,405 genera with a validated  
465 NCBI taxonomy ID (detailed genera and taxa ID see **Supplementary File**). PhyloT  
466 (<http://phylot.biobyte.de/>) was used to map the 1,405 taxonomy IDs to the NCBI common  
467 tree (<https://www.ncbi.nlm.nih.gov/Taxonomy/CommonTree/wwwcmt.cgi>), and  
468 subsequently the results were visualized and modified by an online tool iTOL [55] and  
469 Evolview [56]. 9 subtrees containing the ARG-enriched genera (42 genera) were selected.  
470 Boxplots that show the abundance distribution of the 42 genera across the 132 datasets were  
471 plotted next to the subtrees. A heatmap of ARG count distribution in all the 42 genera was  
472 plotted and the values in each column were normalized using z-score.  
473

## 474 **References**

- 475 1. Tsementzi D, Wu J, Deutsch S, Nath S, Rodriguez RL, Burns AS, Ranjan P, Sarode N,  
476 Malmstrom RR, Padilla CC *et al.* SAR11 bacteria linked to ocean anoxia and nitrogen loss.  
477 Nature 2016: 536(7615):179-183.
- 478 2. Hellweger FL, van Sebille E, Fredrick ND. Biogeographic patterns in ocean microbes emerge  
479 in a neutral agent-based model. Science 2014: 345(6202):1346-1349.
- 480 3. Moran MA. The global ocean microbiome. Science 2015: 350(6266):aac8455.
- 481 4. Jonsson BF, Watson JR. The timescales of global surface-ocean connectivity. Nature  
482 Communications 2016: 7:11239.
- 483 5. Serret P, Robinson C, Aranguren-Gassis M, Garcia-Martin EE, Gist N, Kitidis V, Lozano J,  
484 Stephens J, Harris C, Thomas R. Both respiration and photosynthesis determine the scaling of  
485 plankton metabolism in the oligotrophic ocean. Nature Communications 2015: 6:6961.
- 486 6. Gianoulis TA, Raes J, Patel PV, Bjornson R, Korbel JO, Letunic I, Yamada T, Paccanaro A,  
487 Jensen LJ, Snyder M *et al.* Quantifying environmental adaptation of metabolic pathways in  
488 metagenomics. Proc Natl Acad Sci U S A 2009: 106(5):1374-1379.
- 489 7. Pesant S, Not F, Picheral M, Kandels-Lewis S, Le Bescot N, Gorsky G, Iudicone D, Karsenti  
490 E, Speich S, Trouble R *et al.* Open science resources for the discovery and analysis of Tara  
491 Oceans data. Scientific Data 2015: 2:150023.
- 492 8. Bork P, Bowler C, de Vargas C, Gorsky G, Karsenti E, Wincker P. Tara Oceans. Tara Oceans  
493 studies plankton at planetary scale. Introduction. Science 2015: 348(6237):873.
- 494 9. Sunagawa S, Karsenti E, Bowler C, Bork P. Computational eco-systems biology in Tara  
495 Oceans: translating data into knowledge. Molecular Systems Biology 2015: 11(5):809.
- 496 10. Sunagawa S, Coelho LP, Chaffron S, Kultima JR, Labadie K, Salazar G, Djahanschiri B,  
497 Zeller G, Mende DR, Alberti A *et al.* Ocean plankton. Structure and function of the global  
498 ocean microbiome. Science 2015: 348(6237):1261359.
- 499 11. Martinez JL. Antibiotics and antibiotic resistance genes in natural environments. Science  
500 2008: 321(5887):365-367.

- 501 12. Chacon JM, Harcombe WR. Antimicrobials: Constraints on microbial warfare. *Nature*  
502 *Microbiology* 2016: 1:16225.
- 503 13. Blaser MJ. Antibiotic use and its consequences for the normal microbiome. *Science* 2016:  
504 352(6285):544-545.
- 505 14. Ferrer M, Mendez-Garcia C, Rojo D, Barbas C, Moya A. Antibiotic use and microbiome  
506 function. *Biochemical Pharmacology* 2016.
- 507 15. Forslund K, Sunagawa S, Kultima JR, Mende DR, Arumugam M, Typas A, Bork P. Country-  
508 specific antibiotic use practices impact the human gut resistome. *Genome Research* 2013:  
509 23(7):1163-1169.
- 510 16. Modi SR, Lee HH, Spina CS, Collins JJ. Antibiotic treatment expands the resistance reservoir  
511 and ecological network of the phage metagenome. *Nature* 2013: 499(7457):219-222.
- 512 17. Jorgensen PS, Wernli D, Carroll SP, Dunn RR, Harbarth S, Levin SA, So AD, Schluter M,  
513 Laxminarayan R. Use antimicrobials wisely. *Nature* 2016: 537(7619):159-161.
- 514 18. Laxminarayan R, Amabile-Cuevas CF, Cars O, Evans T, Heymann DL, Hoffman S, Holmes  
515 A, Mendelson M, Sridhar D, Woolhouse M *et al.* UN High-Level Meeting on antimicrobials--  
516 what do we need? *Lancet* 2016: 388(10041):218-220.
- 517 19. Laxminarayan R, Sridhar D, Blaser M, Wang M, Woolhouse M. Achieving global targets for  
518 antimicrobial resistance. *Science* 2016: 353(6302):874-875.
- 519 20. Friedrich MJ. UN Leaders Commit to Fight Antimicrobial Resistance. *Jama* 2016:  
520 316(19):1956.
- 521 21. Ochman H, Lawrence JG, Groisman EA. Lateral gene transfer and the nature of bacterial  
522 innovation. *Nature* 2000: 405(6784):299-304.
- 523 22. Canton R, Morosini MI. Emergence and spread of antibiotic resistance following exposure to  
524 antibiotics. *FEMS Microbiology Reviews* 2011: 35(5):977-991.
- 525 23. Nesme J, Cecillon S, Delmont TO, Monier JM, Vogel TM, Simonet P. Large-scale  
526 metagenomic-based study of antibiotic resistance in the environment. *Current Biology* 2014:  
527 24(10):1096-1100.

- 528 24. Shaw AJ, Lam FH, Hamilton M, Consiglio A, MacEwen K, Brevnova EE, Greenhagen E,  
529 LaTouf WG, South CR, van Dijken H *et al.* Metabolic engineering of microbial competitive  
530 advantage for industrial fermentation processes. *Science* 2016: 353(6299):583-586.
- 531 25. Brauner A, Fridman O, Gefen O, Balaban NQ. Distinguishing between resistance, tolerance  
532 and persistence to antibiotic treatment. *Nature reviews Microbiology* 2016: 14(5):320-330.
- 533 26. Ghosh S, Kuisiene N, Cheeptham N. The cave microbiome as a source for drug discovery:  
534 Reality or pipe dream? *Biochemical Pharmacology* 2016.
- 535 27. Hu Y, Yang X, Qin J, Lu N, Cheng G, Wu N, Pan Y, Li J, Zhu L, Wang X *et al.*  
536 Metagenome-wide analysis of antibiotic resistance genes in a large cohort of human gut  
537 microbiota. *Nature Communications* 2013: 4:2151.
- 538 28. Kanehisa M, Furumichi M, Tanabe M, Sato Y, Morishima K. KEGG: new perspectives on  
539 genomes, pathways, diseases and drugs. *Nucleic Acids Research* 2016.
- 540 29. Rakoff-Nahoum S, Foster KR, Comstock LE. The evolution of cooperation within the gut  
541 microbiota. *Nature* 2016: 533(7602):255-259.
- 542 30. Brauer VS, Stomp M, Bouvier T, Fouilland E, Leboulanger C, Confurius-Guns V, Weissing  
543 FJ, Stal L, Huisman J. Competition and facilitation between the marine nitrogen-fixing  
544 cyanobacterium *Cyanothece* and its associated bacterial community. *Frontiers in*  
545 *Microbiology* 2014: 5:795.
- 546 31. Neuenschwander SM, Pernthaler J, Posch T, Salcher MM. Seasonal growth potential of rare  
547 lake water bacteria suggest their disproportional contribution to carbon fluxes. *Environmental*  
548 *Microbiology* 2015: 17(3):781-795.
- 549 32. Cottrell MT, Kirchman DL. Natural Assemblages of Marine Proteobacteria and Members of  
550 the Cytophaga-Flavobacter Cluster Consuming Low- and High-Molecular-Weight Dissolved  
551 Organic Matter. *Applied and Environmental Microbiology* 2000: 66(4):1692-1697.
- 552 33. Liu B, Pop M. ARDB--Antibiotic Resistance Genes Database. *Nucleic Acids Research* 2009:  
553 37(Database issue):D443-447.



- 554 34. Pommier T, Neal PR, Gasol JM, Coll M, Acinas SG, Pedrós-Alió C. Spatial patterns of  
555 bacterial richness and evenness in the NW Mediterranean Sea explored by pyrosequencing of  
556 the 16S rRNA. *Aquatic Microbial Ecology* 2010: 61(3):221-233.
- 557 35. Pernthaler J. Predation on prokaryotes in the water column and its ecological implications.  
558 *Nature Reviews Microbiology* 2005: 3(7):537-546.
- 559 36. Sun J, Deng Z, Yan A. Bacterial multidrug efflux pumps: mechanisms, physiology and  
560 pharmacological exploitations. *Biochem Biophys Res Commun* 2014: 453(2):254-267.
- 561 37. Chalker AF, Ingraham KA, Lunsford RD, Bryant AP, Bryant J, Wallis NG, Broskey JP,  
562 Pearson SC, Holmes DJ. The *bacA* gene, which determines bacitracin susceptibility in  
563 *Streptococcus pneumoniae* and *Staphylococcus aureus*, is also required for virulence.  
564 *Microbiology* 2000: 146 ( Pt 7):1547-1553.
- 565 38. Kempf MJ, McBride MJ. Transposon insertions in the *Flavobacterium johnsoniae* *ftsX* gene  
566 disrupt gliding motility and cell division. *Journal of Bacteriology* 2000: 182(6):1671-1679.
- 567 39. Burns JH, Strauss SY. More closely related species are more ecologically similar in an  
568 experimental test. *Proc Natl Acad Sci U S A* 2011: 108(13):5302-5307.
- 569 40. Aminov RI. The role of antibiotics and antibiotic resistance in nature. *Environmental*  
570 *Microbiology* 2009: 11(12):2970-2988.
- 571 41. Allison SD. Cheaters, diffusion and nutrients constrain decomposition by microbial enzymes  
572 in spatially structured environments. *Ecology Letters* 2005: 8(6):626-635.
- 573 42. Blanco P, Hernando-Amado S, Reales-Calderon JA, Corona F, Lira F, Alcalde-Rico M,  
574 Bernardini A, Sanchez MB, Martinez JL. Bacterial Multidrug Efflux Pumps: Much More  
575 Than Antibiotic Resistance Determinants. *Microorganisms* 2016: 4(1):14.
- 576 43. Chen B, Yang Y, Liang X, Yu K, Zhang T, Li X. Metagenomic profiles of antibiotic  
577 resistance genes (ARGs) between human impacted estuary and deep ocean sediments.  
578 *Environmental Scienc and Technology* 2013: 47(22):12753-12760.

- 579 44. Zhu YG, Zhao Y, Li B, Huang CL, Zhang SY, Yu S, Chen YS, Zhang T, Gillings MR, Su JQ.  
580 Continental-scale pollution of estuaries with antibiotic resistance genes. *Nature Microbiology*  
581 2017: 2:16270.
- 582 45. Matyar F. Antibiotic and Heavy Metal Resistance in Bacteria Isolated from the Eastern  
583 Mediterranean Sea Coast. *Bulletin of Environmental Contamination and Toxicology* 2012:  
584 89(3):551-556.
- 585 46. Halpern BS, Walbridge S, Selkoe KA, Kappel CV, Micheli F, Agrosa C, Bruno JF, Casey KS,  
586 Ebert C, Fox HE *et al.* A Global Map of Human Impact on Marine Ecosystems. *Science* 2008:  
587 319(5865):948.
- 588 47. Martínez JL. Antibiotics and Antibiotic Resistance Genes in Natural Environments. *Science*  
589 2008: 321(5887):365.
- 590 48. Su X, Pan W, Song B, Xu J, Ning K. Parallel-META 2.0: enhanced metagenomic data  
591 analysis with functional annotation, high performance computing and advanced visualization.  
592 *PloS one* 2014: 9(3):e89323.
- 593 49. DeSantis TZ, Hugenholtz P, Larsen N, Rojas M, Brodie EL, Keller K, Huber T, Dalevi D, Hu  
594 P, Andersen GL. Greengenes, a chimera-checked 16S rRNA gene database and workbench  
595 compatible with ARB. *Applied Environmental Microbiology* 2006: 72(7):5069-5072.
- 596 50. Weiss S, Van Treuren W, Lozupone C, Faust K, Friedman J, Deng Y, Xia LC, Xu ZZ, Ursell  
597 L, Alm EJ *et al.* Correlation detection strategies in microbial data sets vary widely in  
598 sensitivity and precision. *The ISME journal* 2016: 10(7):1669-1681.
- 599 51. Shannon P, Markiel A, Ozier O, Baliga NS, Wang JT, Ramage D, Amin N, Schwikowski B,  
600 Ideker T. Cytoscape: a software environment for integrated models of biomolecular  
601 interaction networks. *Genome Research* 2003: 13(11):2498-2504.
- 602 52. Bader GD, Hogue CW. An automated method for finding molecular complexes in large  
603 protein interaction networks. *BMC Bioinformatics* 2003: 4:2.

- 604 53. Quince C, Delmont TO, Raguideau S, Alneberg J, Darling AE, Collins G, Eren AM.  
605 DESMAN: a new tool for de novo extraction of strains from metagenomes. *Genome Biology*  
606 2017; 18(1):181.
- 607 54. Federhen S. The NCBI Taxonomy database. *Nucleic Acids Research* 2012; 40(Database  
608 issue):D136-143.
- 609 55. Letunic I, Bork P. Interactive tree of life (iTOL) v3: an online tool for the display and  
610 annotation of phylogenetic and other trees. *Nucleic Acids Research* 2016; 44(W1):W242-245.
- 611 56. He Z, Zhang H, Gao S, Lercher MJ, Chen WH, Hu S. Evolview v2: an online visualization  
612 and management tool for customized and annotated phylogenetic trees. *Nucleic Acids*  
613 *Research* 2016; 44(W1):W236-241.

614

615

616

617 **Figure Legends**

618

619 **Figure 1. Global views at genus level and OTU level and a subnetwork at genus level. (a)**

620 The global species co-occurrence network at genus level. Red and green edges represent  
621 positive and negative correlation between two linked genera (nodes), respectively. Genera in  
622 a cluster were colored in green, while singletons were colored in blue. **(b)** A sub-network  
623 related to depth variable at genus level. Depth was an important environment factor and had  
624 certain correlations with temperature, oxygen and chlorophyll concentration, so this depth-  
625 related sub-network was exemplified the validity for our network. Each node represents a  
626 genus and each edge presents a co-occurrence relationship. Color of edges present the  
627 relationship strength (calculated by Pearson Correlation Coefficient) of species-species (or  
628 genus-genus) co-occurrence relationship. The cluster from surface water contained 6 genera  
629 that were highly positively related, and the cluster from deep sea contains 5 genera that were  
630 highly positively related. **(c)** The global view of species co-occurrence network at OTU level.  
631 7 clusters labeled in different colors were produced by using MCODE cluster algorithm. Each  
632 node represents a selected OTU, and edges in red and green represent positive and negative  
633 correlation between two connected OTUs, respectively. The four triangle-shaped nodes were  
634 identified as hub nodes in the network.

635

636 **Figure 2. Distribution and classification of detected ARGs. (A) and (B) Boxplots of the**

637 distribution of ARG sequences and ARG types in three water layers, respectively. The  
638 normalization method was described in section “**Materials and Methods**”. **(C)** A heatmap of  
639 the Top 10 abundant ARG types in each water layer. A white tile means that this ARG type  
640 was not detected in this water layer. **(D) The classification of ARGs sequences.** The ARGs  
641 sequences are classified according to WHOCC ATC/DDD Index. Amphenicols was the most

642 abundant antibiotic class. Abbreviations used: SRF, surface water layer; DCM, deep  
643 chlorophyll maximum layer; MIX, subsurface epipelagic mixed layer; MES, mesopelagic  
644 zone. The data used for plotting was exhibited in **Supplementary Table S10**.

645

646 **Figure 3. Enrichment analysis of ARGs in marine microbial genera.** A total of 20 out of  
647 75 resistance types were selected as examples to show the enrichment of ARGs in genera (the  
648 complete set of data used was exhibited in **Supplementary Table S7**). **(a)** To determine  
649 whether a resistance type is enriched in a genus, univariate hypergeometric test is performed.  
650 The cell color is determined according to the  $p$ -values produced by univariate hypergeometric  
651 tests. Column names represent resistance types and row names represent genera. A “N/A” tag  
652 was assigned to a row that contains ARGs that are not identified in any of the 11 genera or  
653 the best hit did not meet the identity threshold of 40%. The horizontal and vertical rectangles  
654 highlight the number of ARGs in *Flavobacterium* and the number of *bacA* in genera,  
655 respectively. In the cell where two rectangles overlap, the number means that 42 *bacA*  
656 sequences were identified in *Flavobacterium*. **(b)** To determine whether a resistance type is  
657 enriched in all genera, multivariate hypergeometric test (the lower, the more significant) is  
658 performed. The background colors are determined by the  $p$ -values measured by multivariate  
659 hypergeometric tests. **(c)** To determine among all genera containing *bacA*, which one is more  
660 *bacA*-enriched, a relative proportion calculation method is performed. 73.9% of all *bacA*  
661 sequences were found in *Flavobacterium*. **(d)** To determine whether a genus is enriched with  
662 ARGs, multivariate hypergeometric test is performed on each genus against all resistance  
663 types.  $P$ -values representing very significant ARG enrichment ( $p$ -value<1e-100) in four rows  
664 were highlighted in bold font, and so were the corresponding genus names (*Alteromonas*,  
665 *Pseudoalteromonas*, *Marinobacter*, and *Flavobacterium*). **(e)** To determine among all  
666 resistance types detected in genus *Flavobacterium*, which one is most enriched, the relative

667 proportion calculation method is performed. The relative proportions of sequences of all 7  
668 resistance types found in *Flavobacterium* and *bacA* sequences make up 41.58% of them, and  
669 it is highlighted by a red rectangle. Abbreviation: aac3ia, aac6ig Aminoglycoside N-  
670 acetyltransferase. acra, Resistance-nodulation-cell division transporter system. adeb, AdeB  
671 family multidrug efflux RND transporter permease. amrb, AmmeMemoRadiSam system  
672 protein B. ant3ia, Aminoglycoside O-nucleotidyltransferase. aph33ib, streptomycin  
673 phosphotransferase. arna, Nucleoside-diphosphate-sugar epimerases. Baca, Undecaprenyl  
674 pyrophosphate phosphatase. bcra, Bacitracin transport ATP-binding gene. bl2a\_nps, bl2b\_tle,  
675 bl2c\_bro, bl2d\_oxa2, bl2e\_y56: Class A beta-lactamase. catb1, catb2: Group B  
676 chloramphenicol acetyltransferase.

677

678 **Figure 4. Phylogenetic analysis of ARG-enriched genera and their corresponding**  
679 **relative abundance and ARG enrichment patterns. (a)** A phylogenetic tree of 1,405  
680 detected marine genera, including archaea and bacteria. Branches colored red represent the  
681 phylogenetic locations of 11 ARG-enriched genera. **(b)** 8 subtrees containing the 11 ARG-  
682 enriched genera (highlighted by red lines) were selected from the phylogenetic tree, which in  
683 total contains 37 genera. These genera are enriched with ARGs compared with their closest  
684 phylogenetic neighbors (\*) or all in the whole sub-tree (\*\*). **(c)** Relative abundance of each  
685 of the 37 genera in (b) in 132 datasets (horizontally aligned). **(d)** A heatmap of the relative  
686 abundance distribution of several resistance types in the 37 genera in (b) (horizontally  
687 aligned). Horizontal axis represents the resistance types mapped to the genera in (b). Panels  
688 (b), (c) and (d) together indicate that genera enriched with ARGs are significantly more  
689 abundant in a microbial community, as well as compared with their phylogenetic neighbors in  
690 the microbial community.

691

692 **Figure 5. The hypothesis on possible involvement of human-activities in ARG influence**  
693 **on microbial community structures. (a)** Possible antibiotic sources that are related with  
694 human activities. **(b)** ARGs might then become enriched in microbial communities under the  
695 selection pressure caused by antibiotics. **(c)** In an off-shore microbial community with little  
696 impact from antibiotics and human activities, the yellow colored genera in the green circle  
697 are not dominant. Genera shown here were identified as ARG-enriched by enrichment  
698 analysis (*Alteromonas*, *Pseudoalteromonas*, *Marinobacter*, and *Flavobacterium*, etc.). **(d)** An  
699 in-shore microbial community in which ARG-enriched genera (colored in yellow) become  
700 dominant.

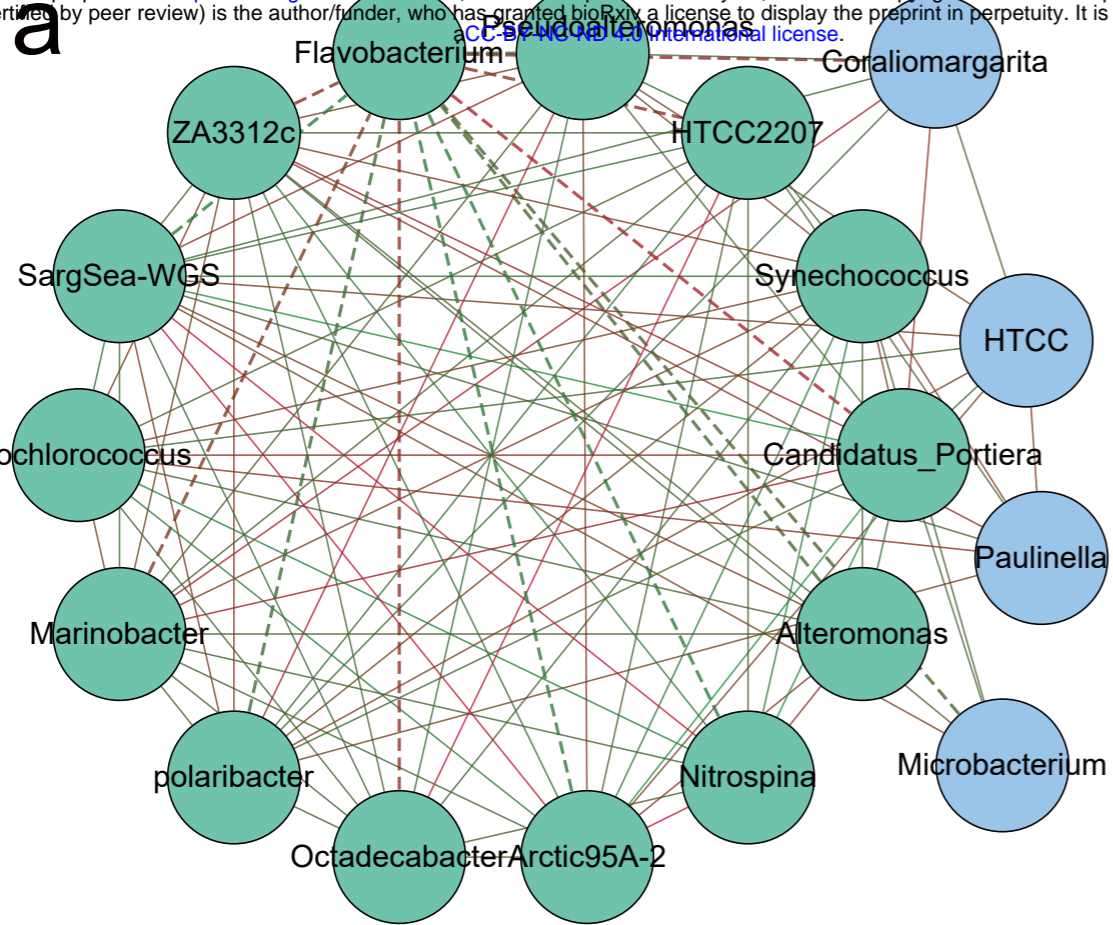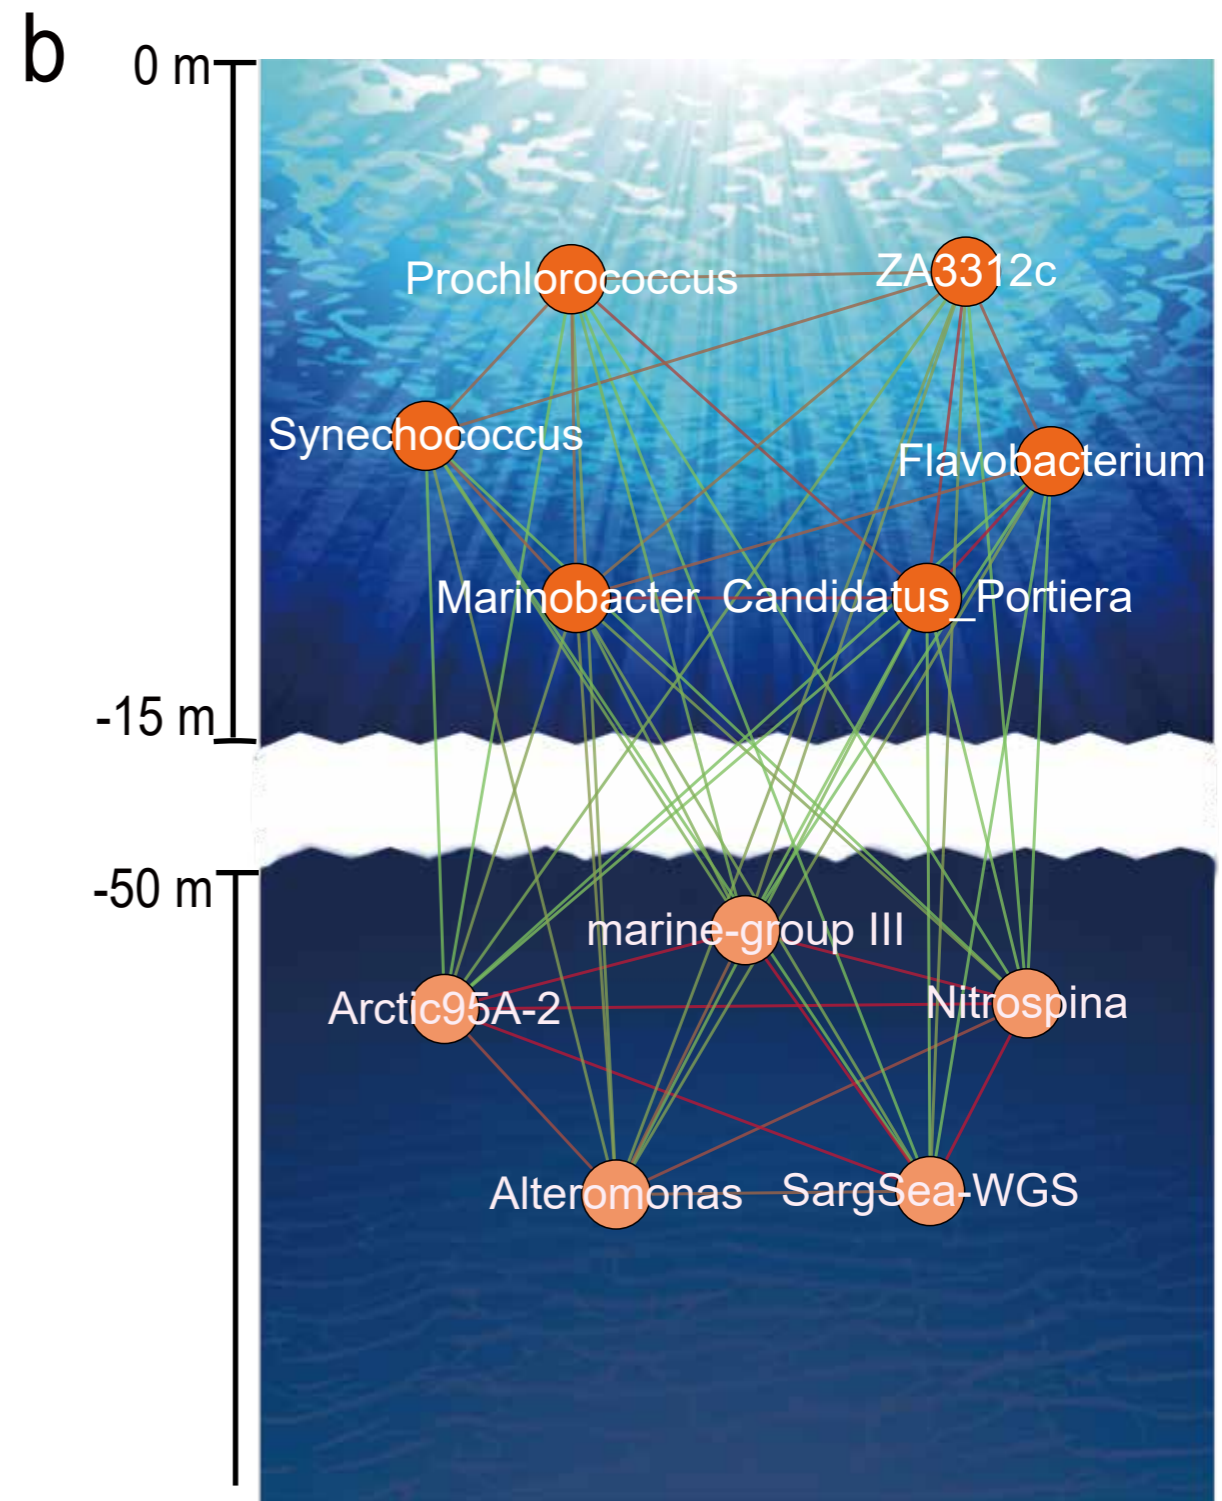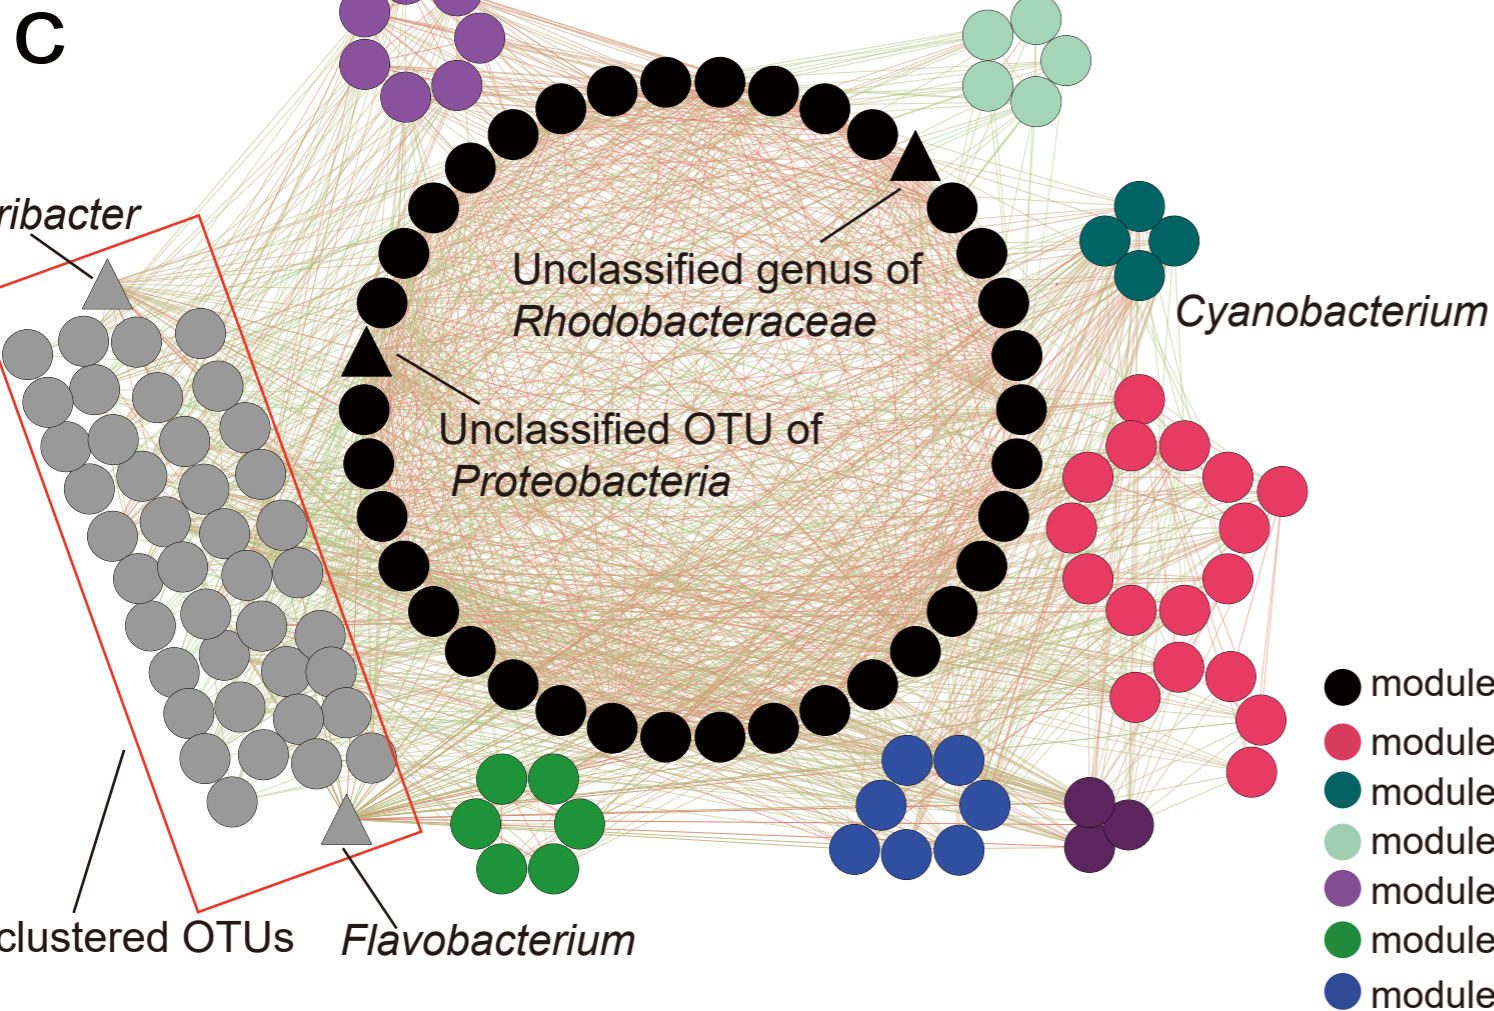



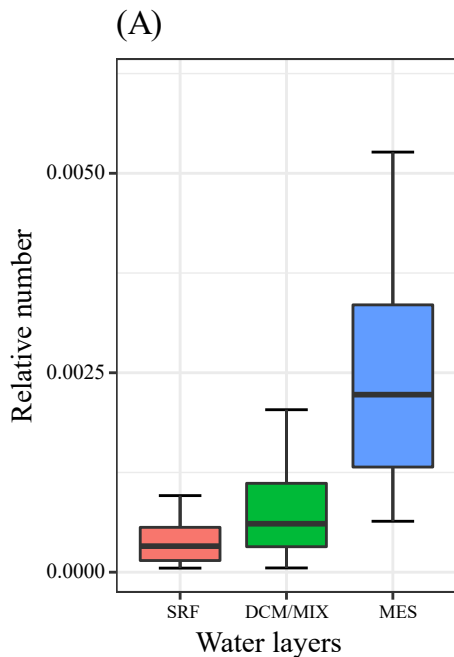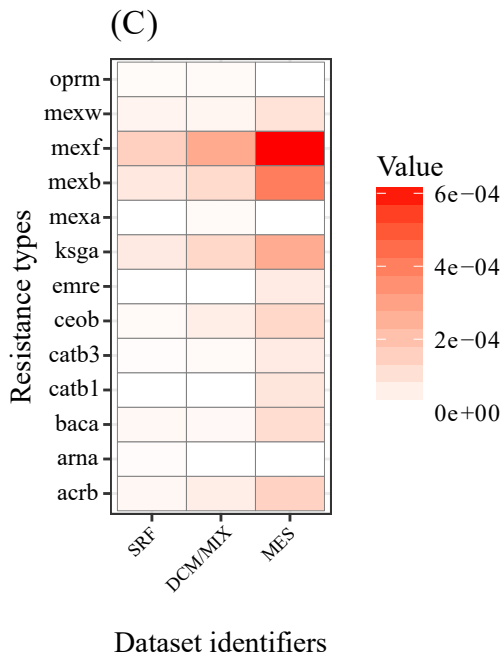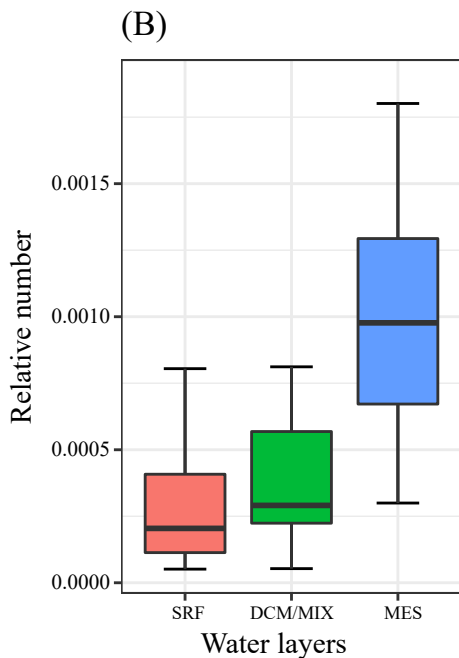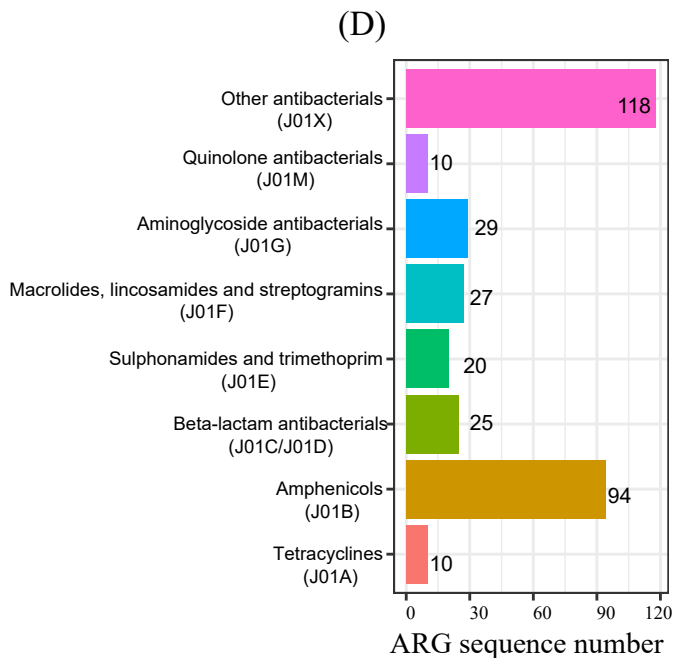

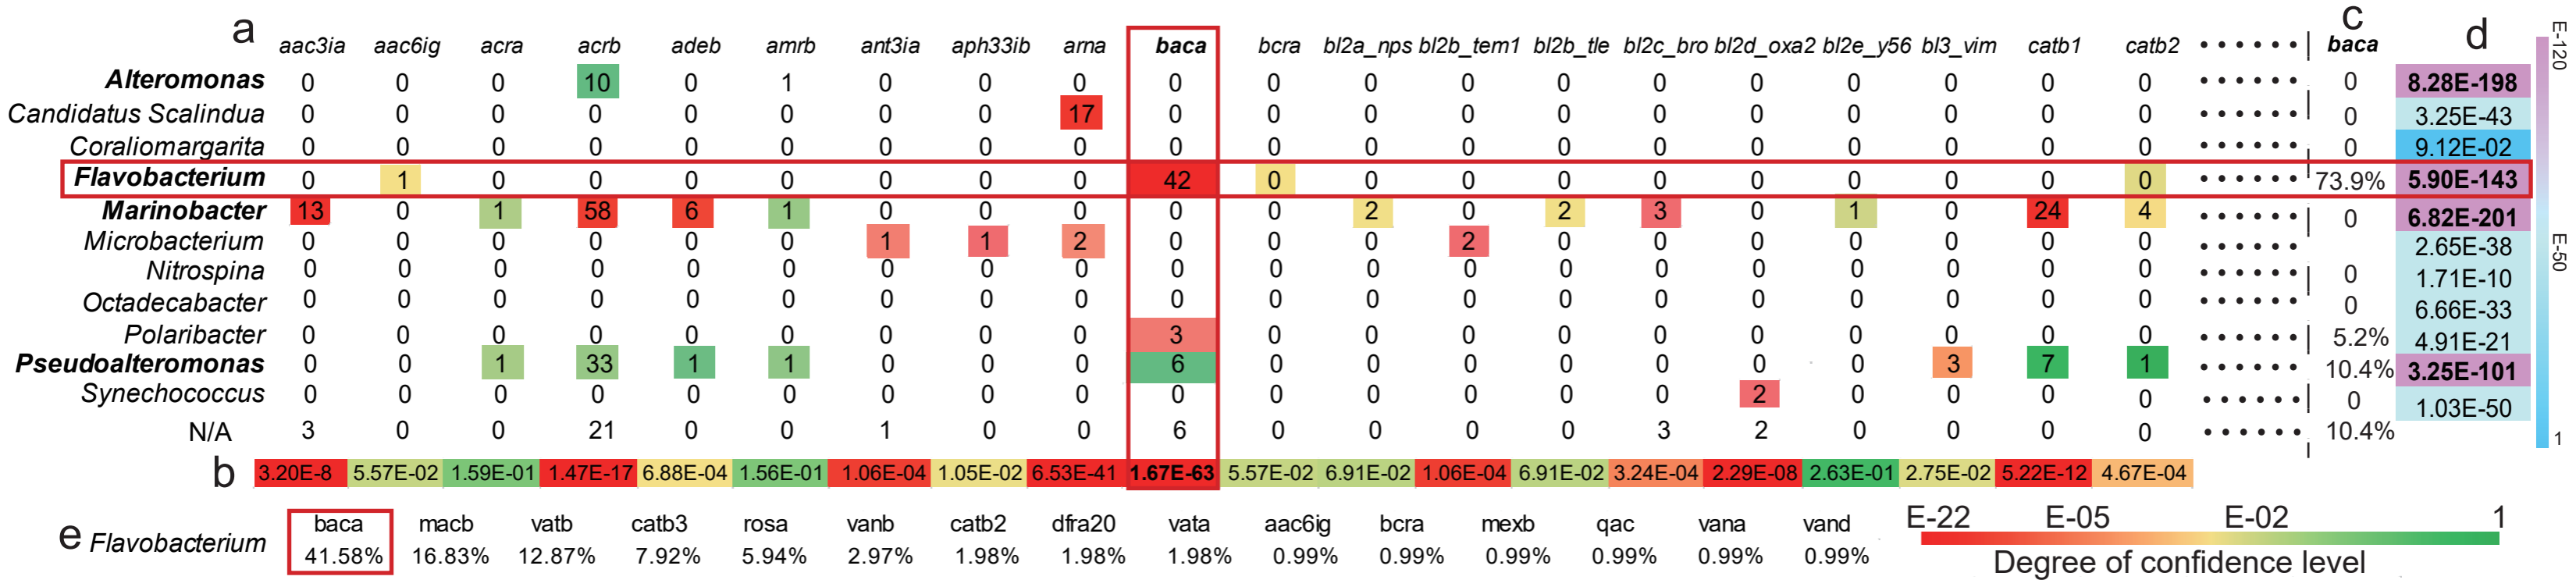

**a**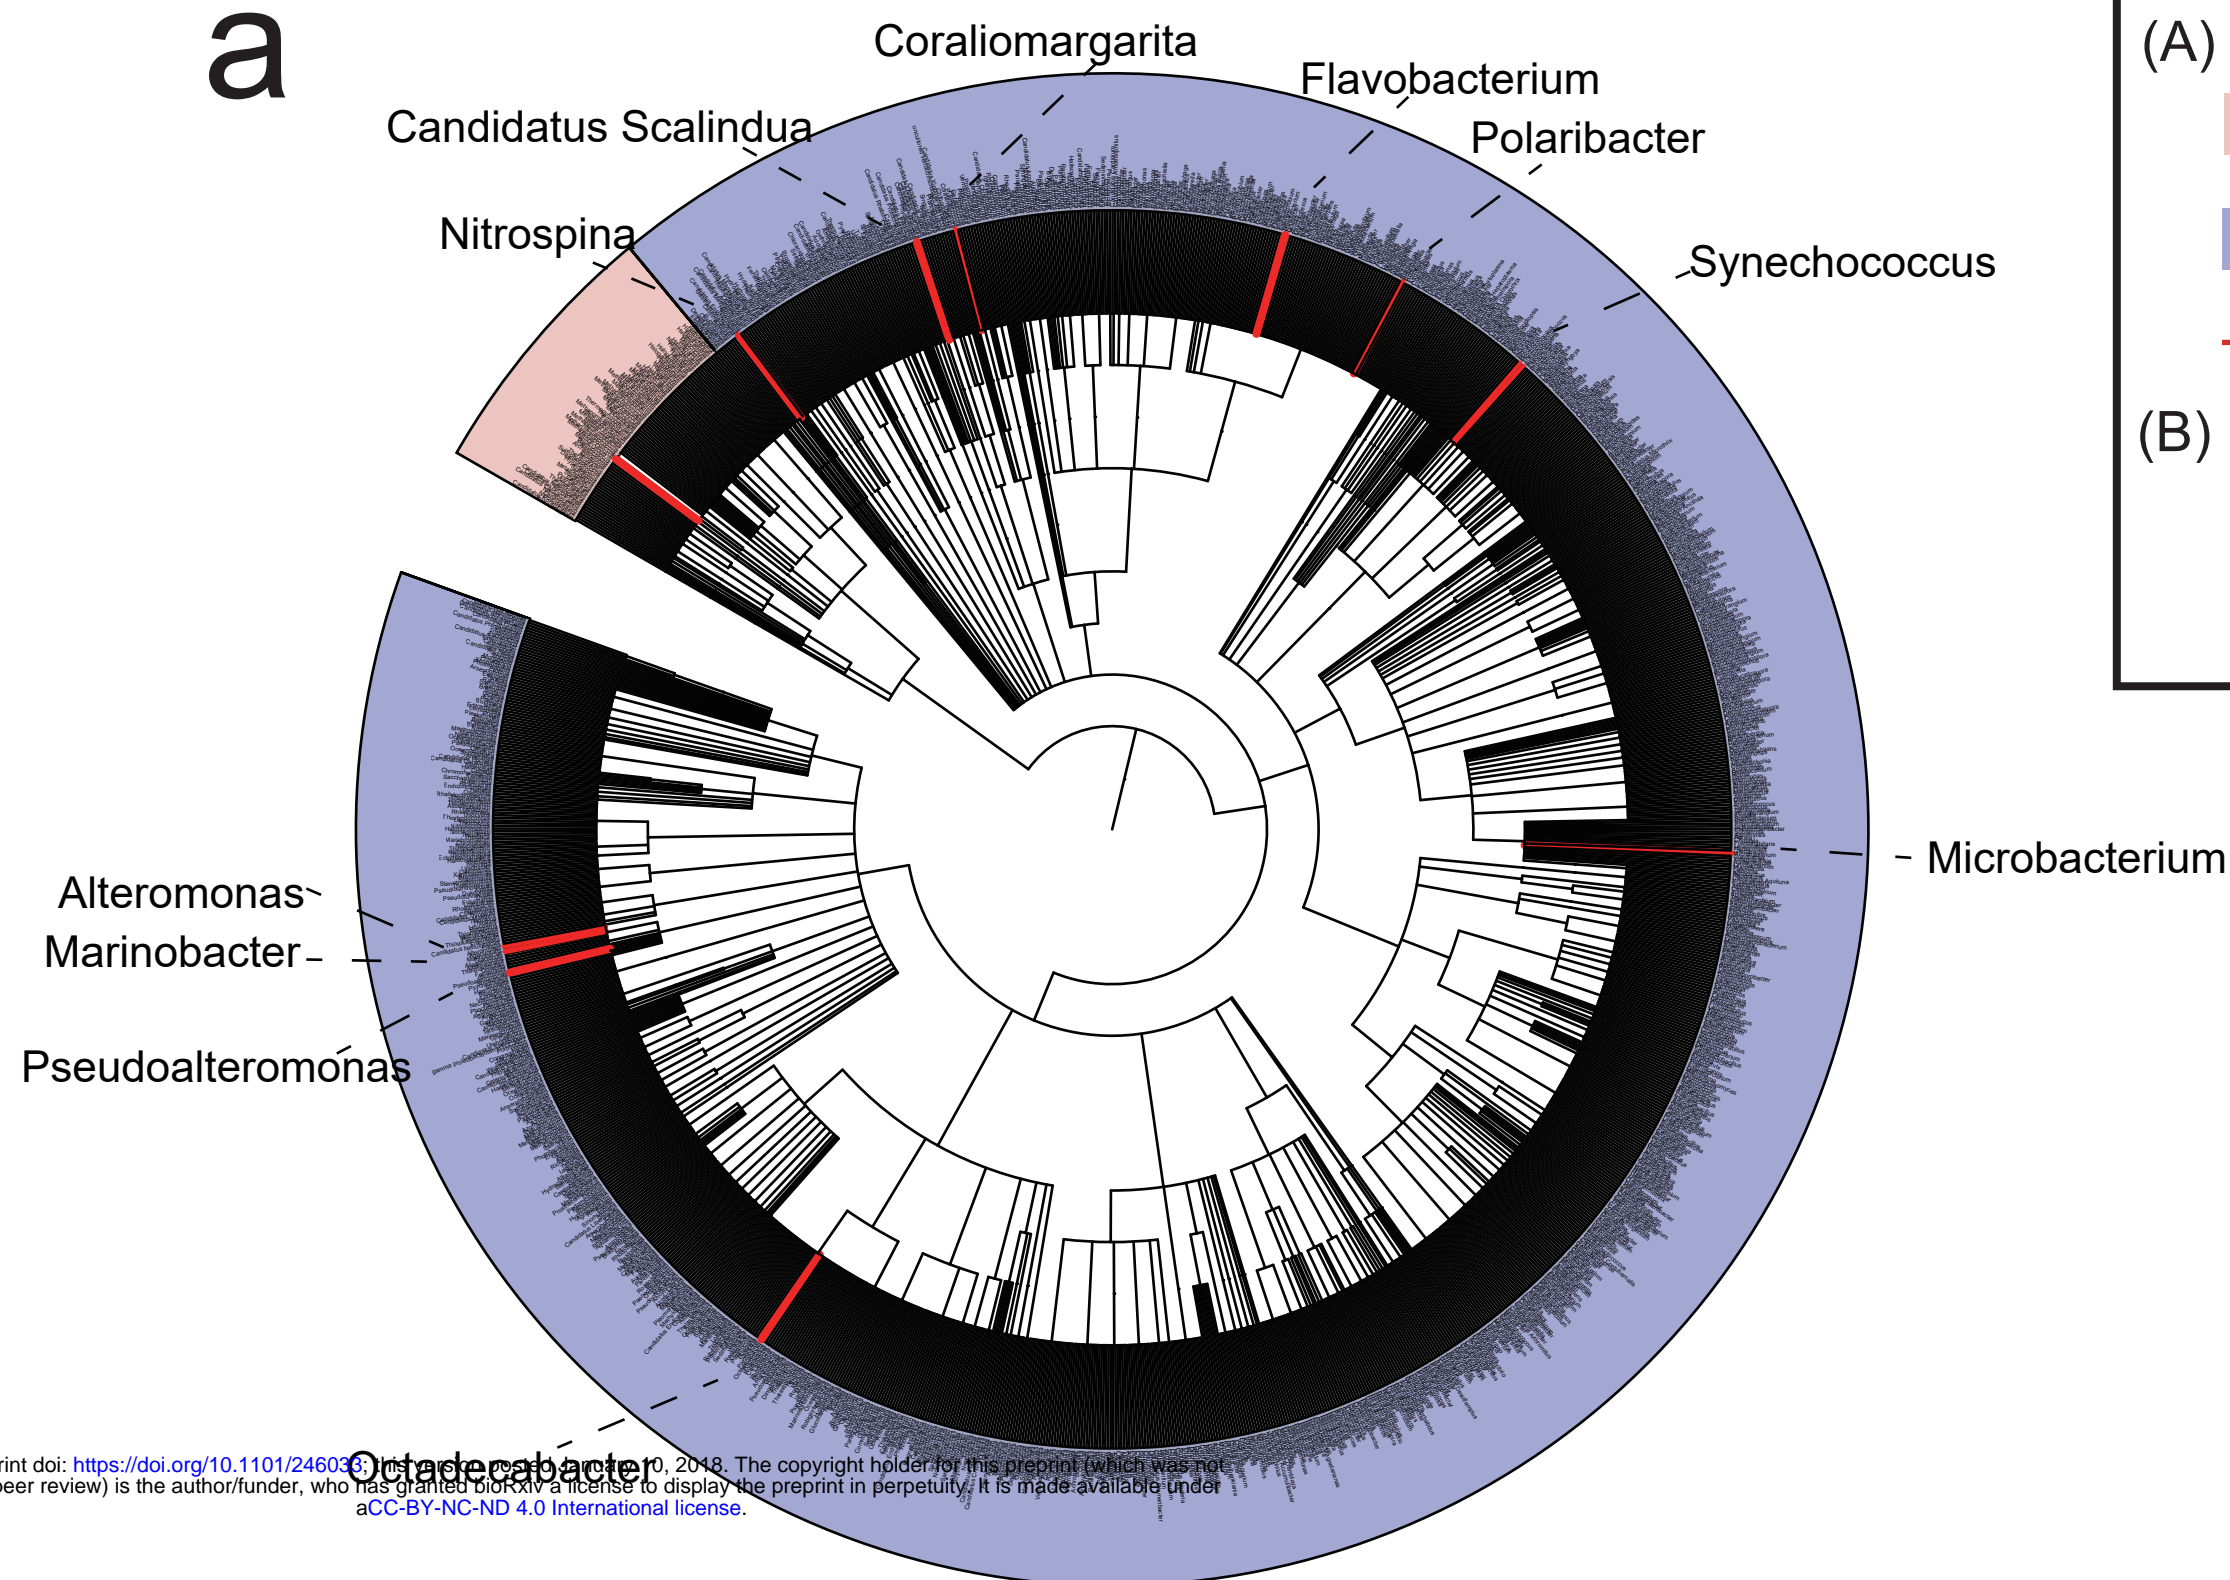**(A)**

Legend

Archaea

Bacteria

Antibiotic gene enriched genera

**(B)**T-test value for abundance distribution  
Significant difference threshold 0.01

\* significant in pairwise comparison

\*\* significant in the whole subtree

bioRxiv preprint doi: <https://doi.org/10.1101/246030>; this version posted October 10, 2018. The copyright holder for this preprint (which was not certified by peer review) is the author/funder, who has granted bioRxiv a license to display the preprint in perpetuity. It is made available under aCC-BY-NC-ND 4.0 International license.

ARGs abundance

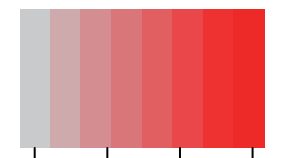

0 2 4 6

Column Z-Score

**b**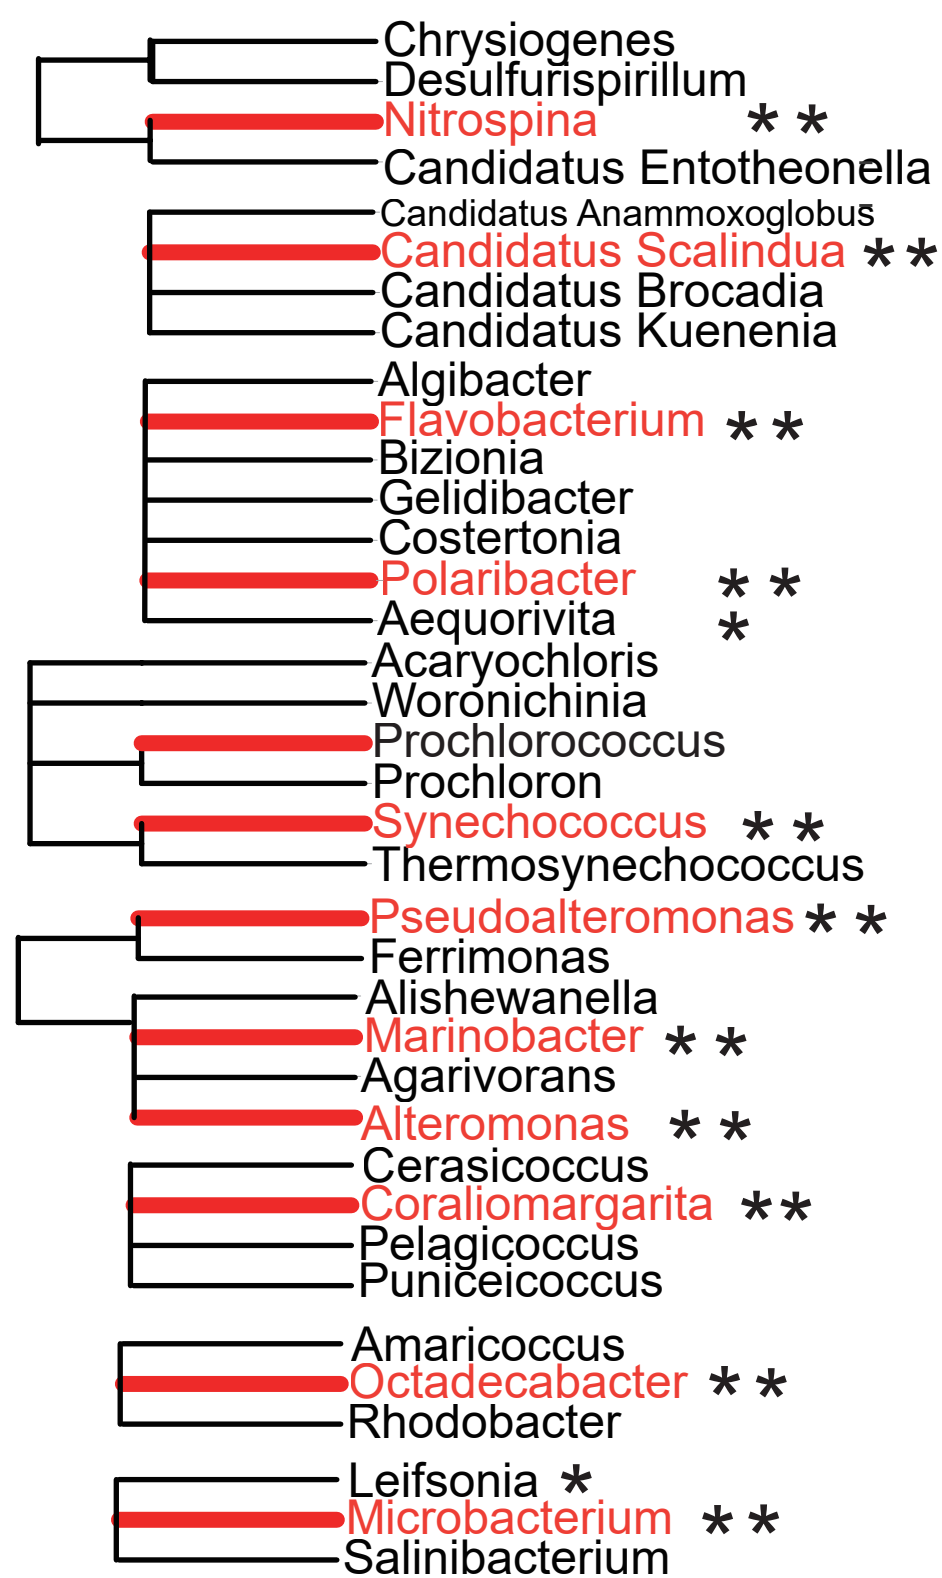**c**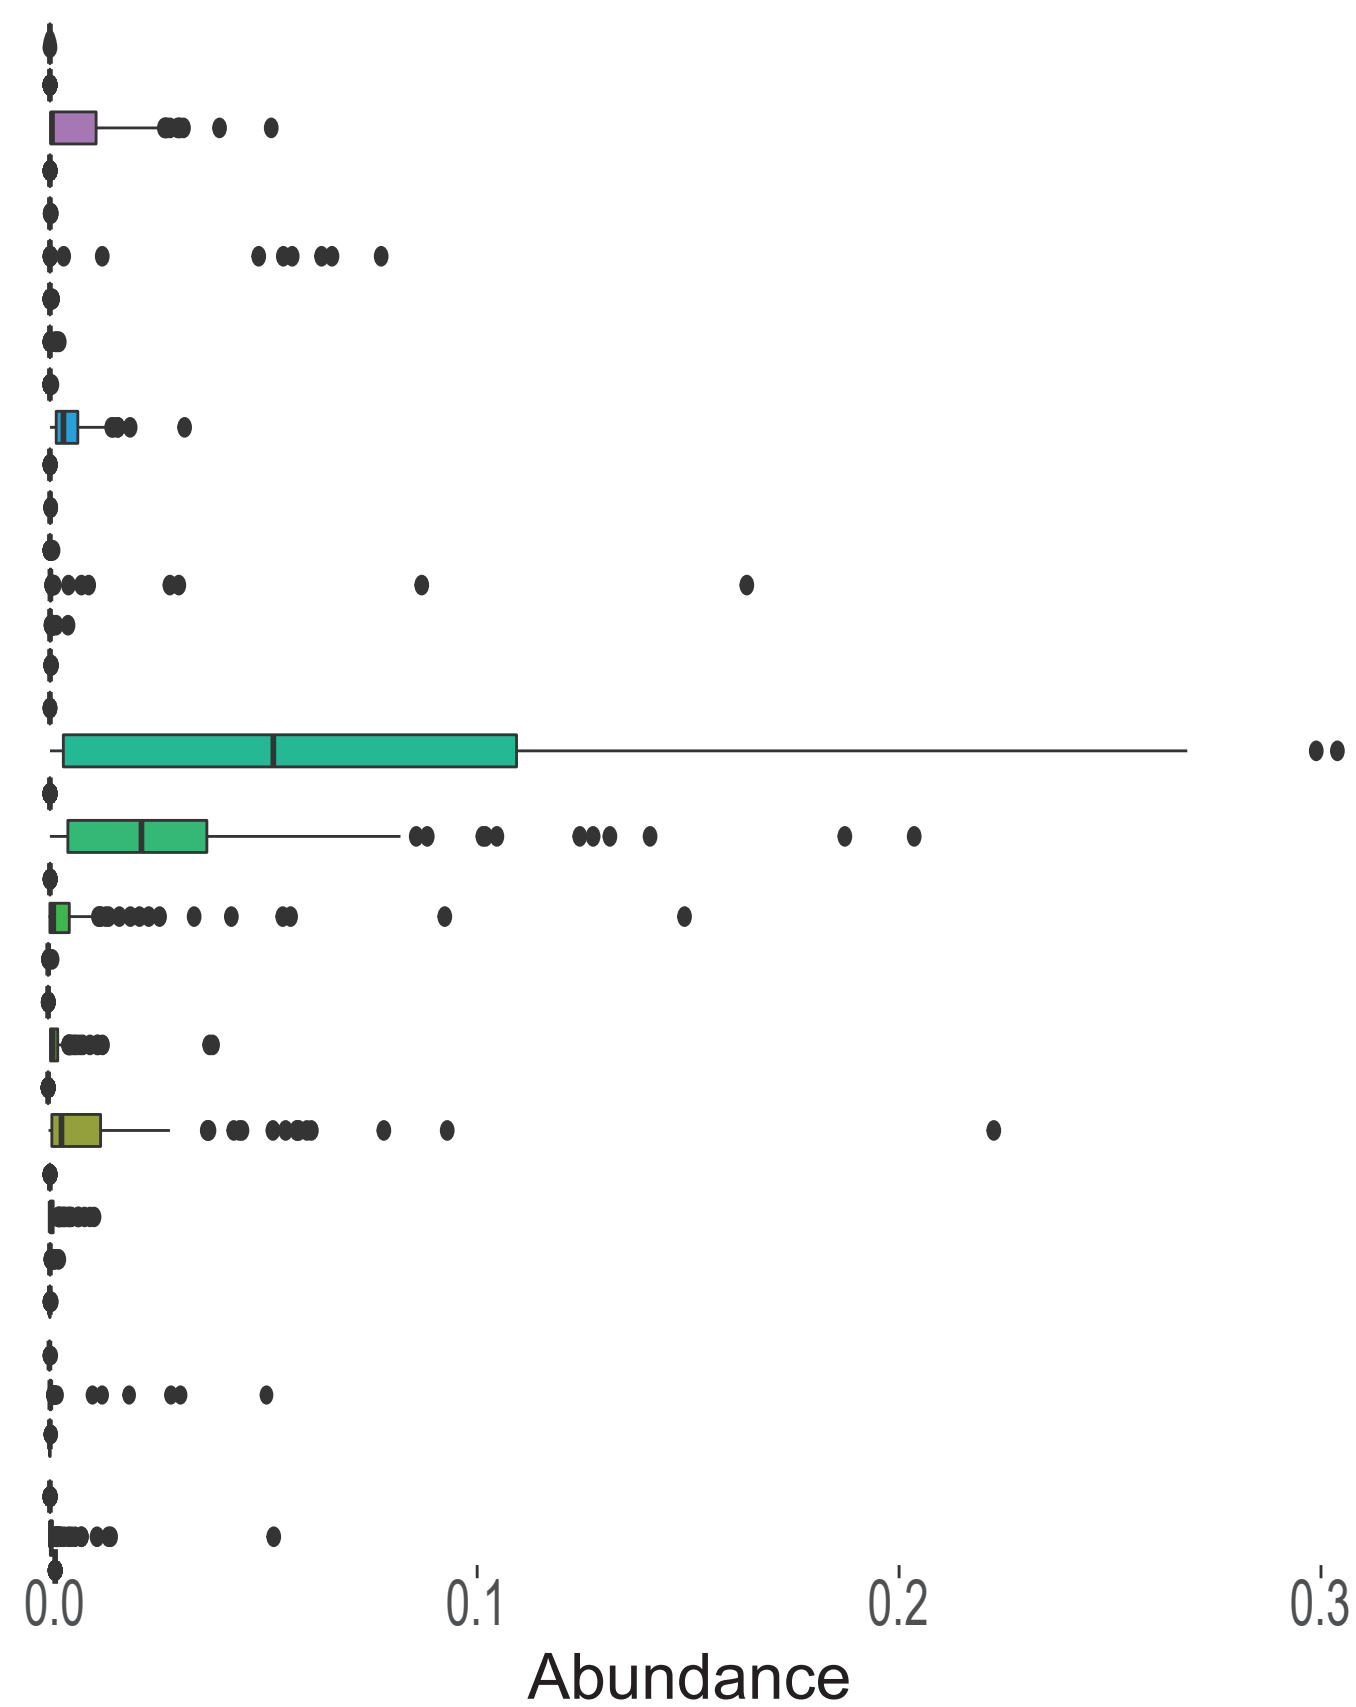**d**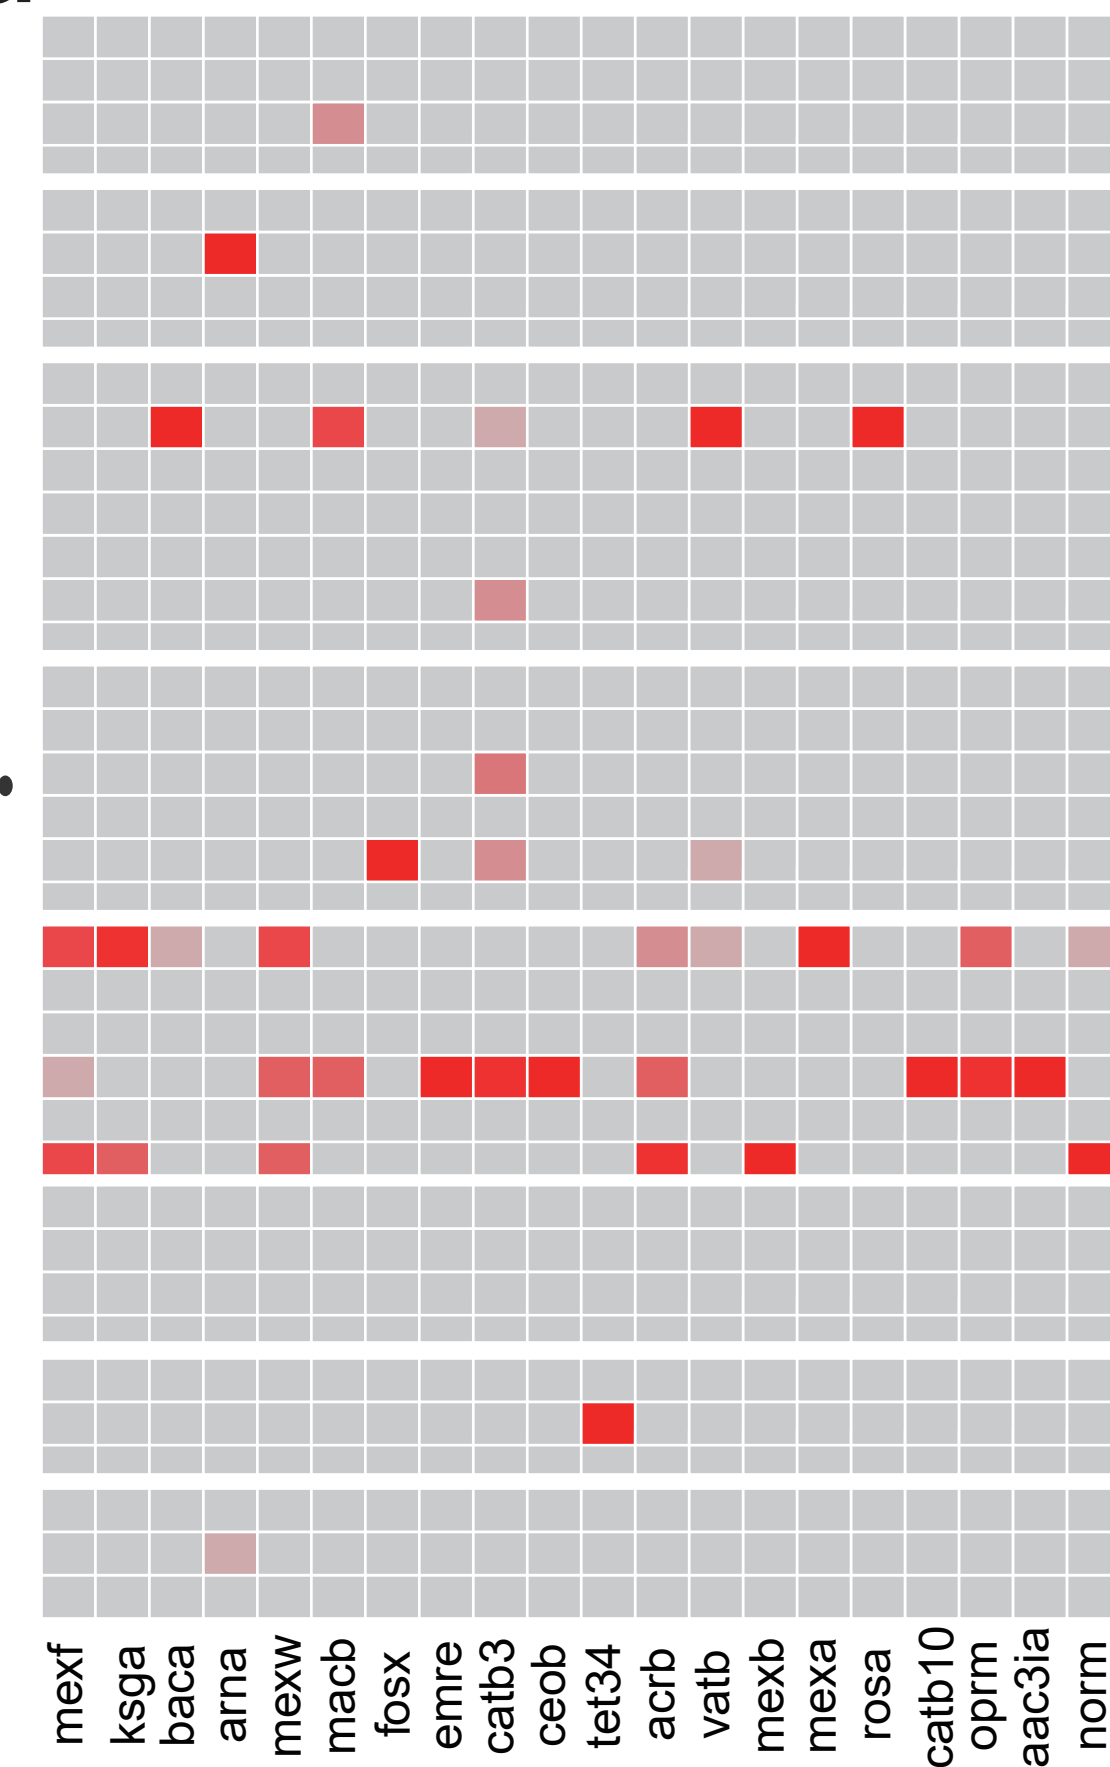

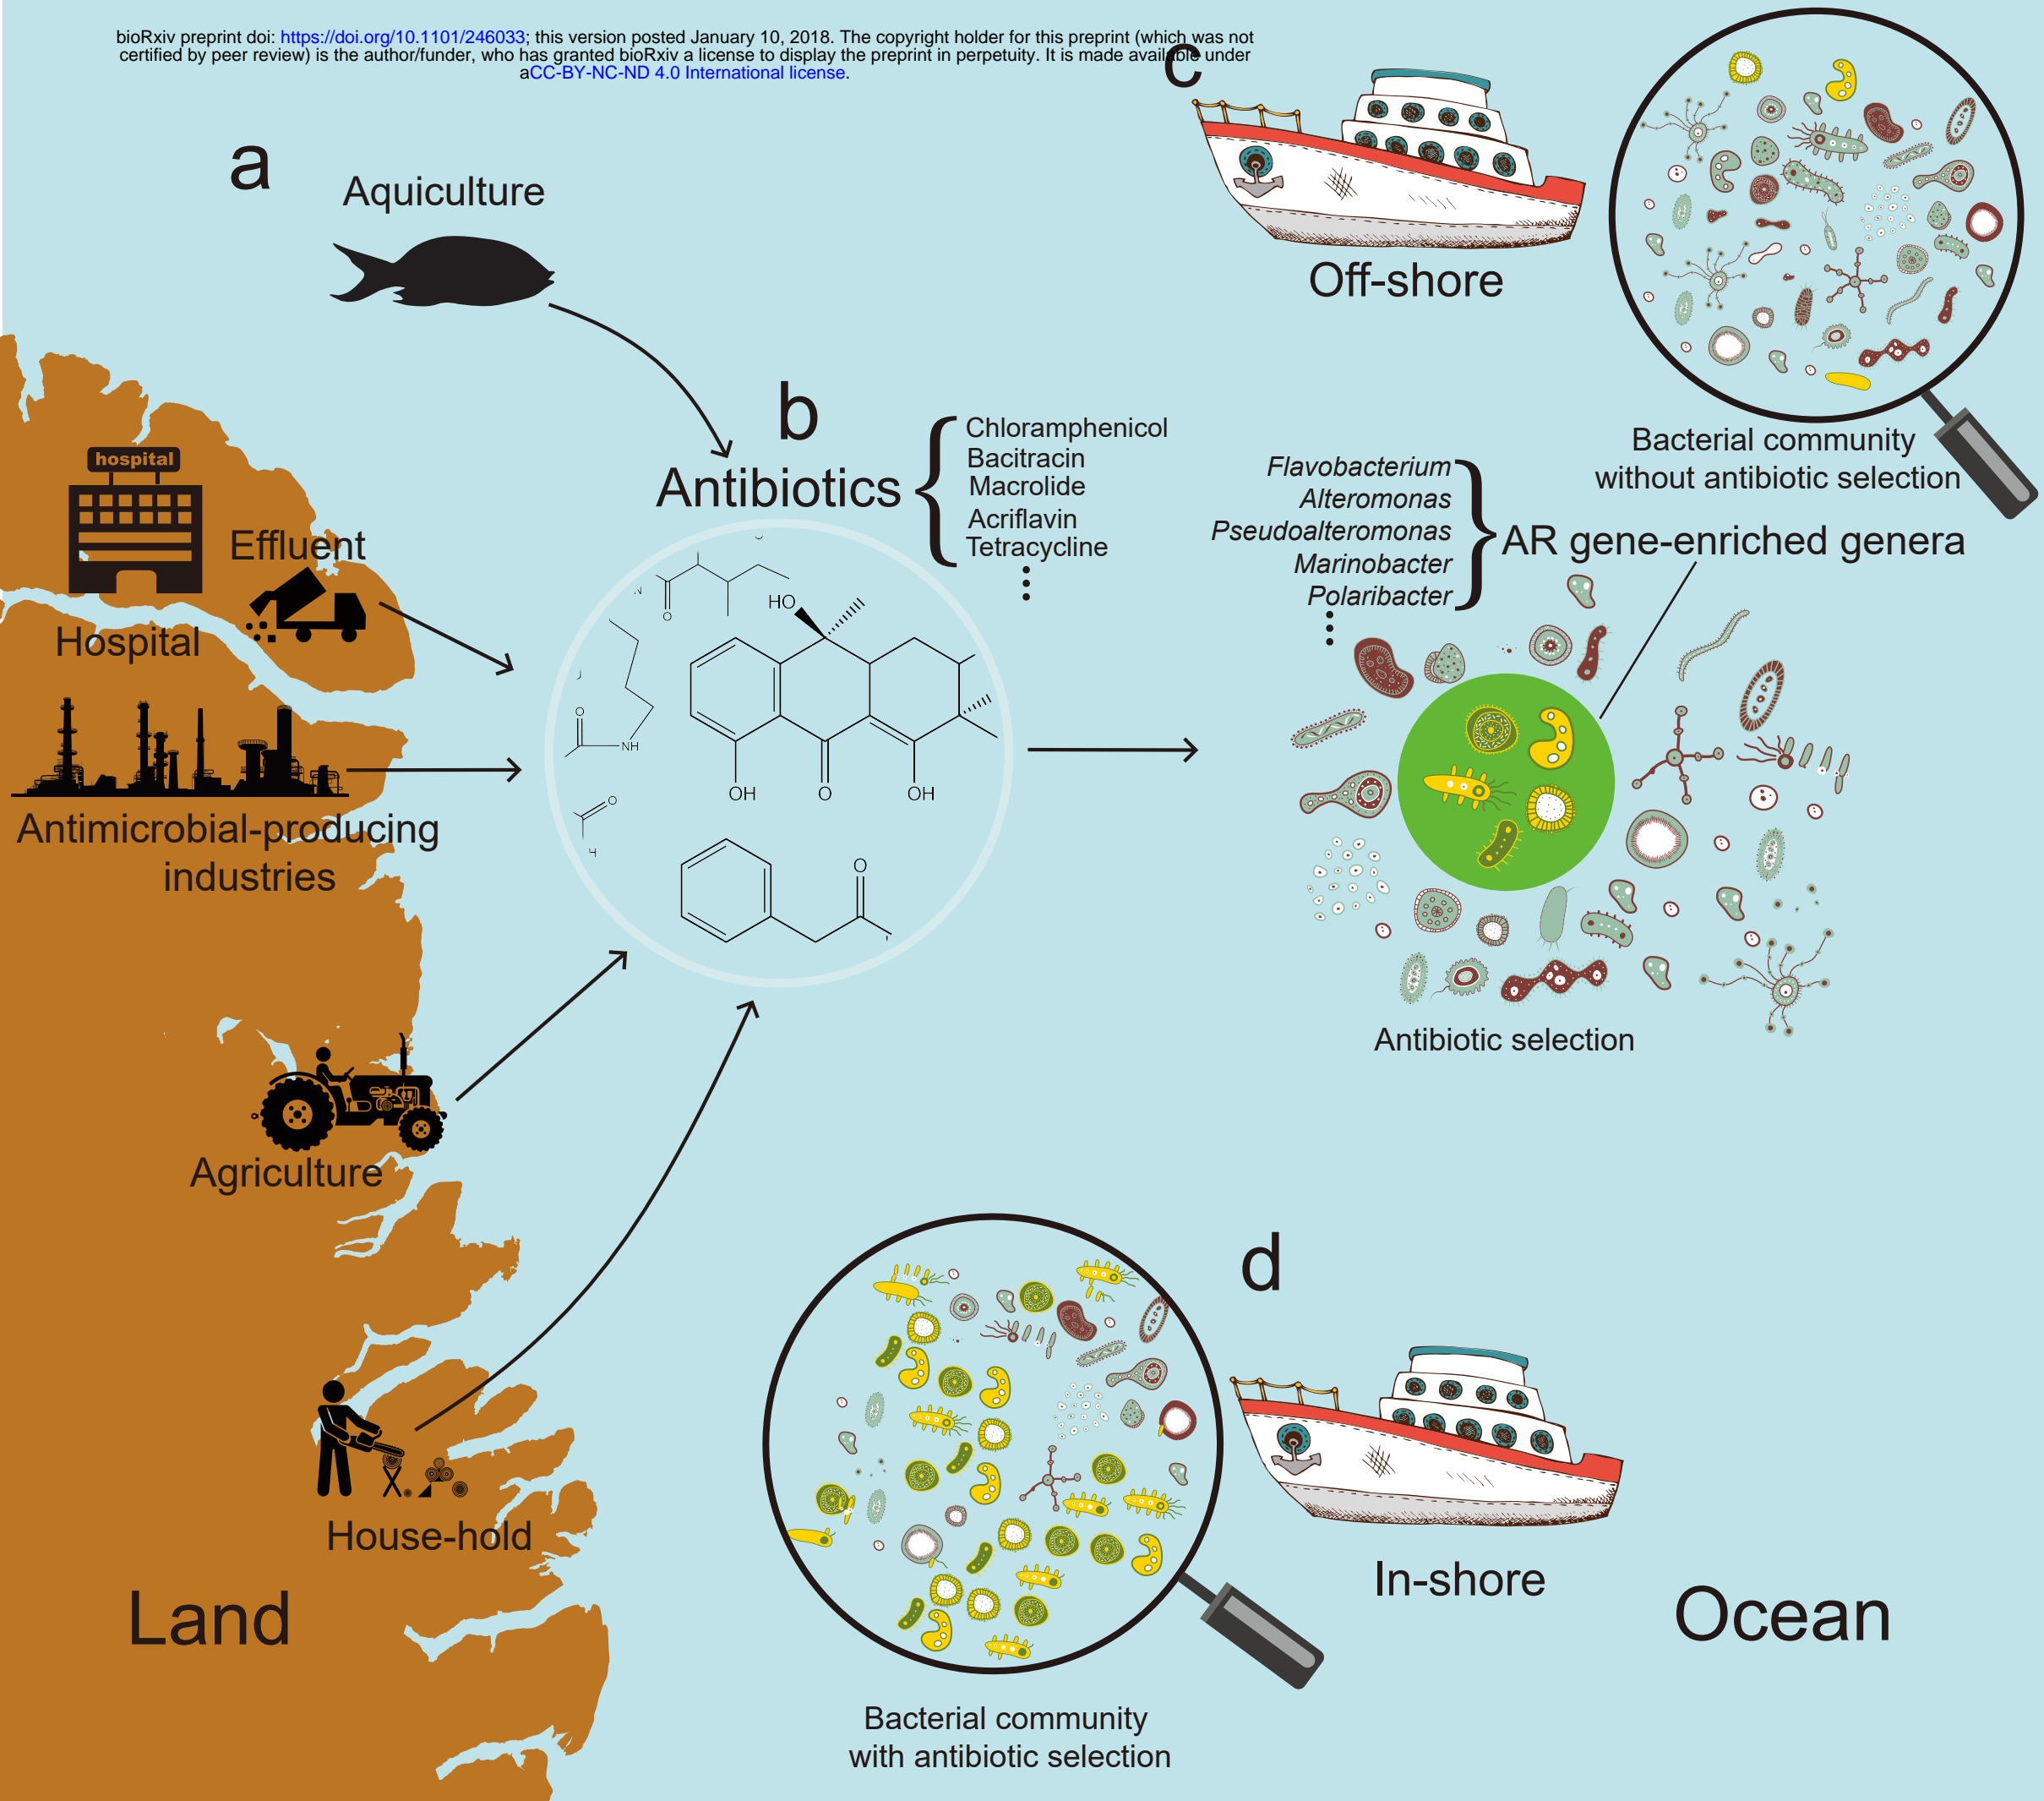

Source: https://www.biorxiv.org/content/10.1101/246033v1.full.pdf
